# Supplementary material for: Precise control of the degree and regioselectivity of functionalization in nitro- and amino-functionalized di(trispyrazolylborato)iron( ii ) spin crossover complexes
Source: Royal Society of Chemistry journal article supplement (doi:10.1039/d1dt03445f), 2021-01-01
Supplement: d1dt03445f1.pdf [file d1dt03445f1.pdf]

# Precise control of the degree and regioselectivity of functionalization in nitro- and amino-functionalized di(trispyrazolylborato)iron(II) spin crossover complexes

Chenyang Ma, Claire Besson\*

Department of Chemistry, The George Washington University, 800 22<sup>nd</sup> Street NW,  
Washington, D.C. 20052, United States

## **SUPPLEMENTARY INFORMATION**

Molecular solid-state structures: pp. 2-6  
Crystallographic parameters: pp. 7-9  
Crystal packing diagrams: pp. 10-19  
PXRD spectra: pp. 20-23  
IR spectra: pp. 24-28  
UV-vis spectra: pp. 29-33  
TGA: pp. 34-37  
SQUID magnetization data and fits: pp. 38-42

## Solid-state structure of all compounds

### Solid-state structure of TBA[3-NO<sub>2</sub>Tp]

a.)

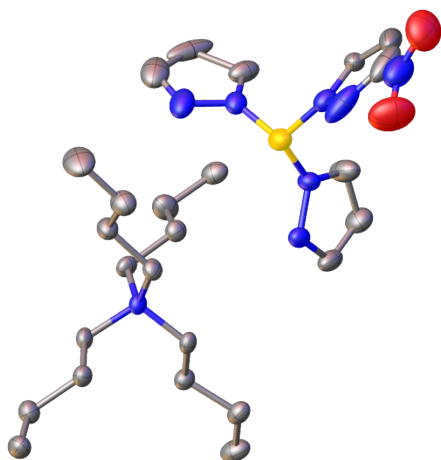

b.)

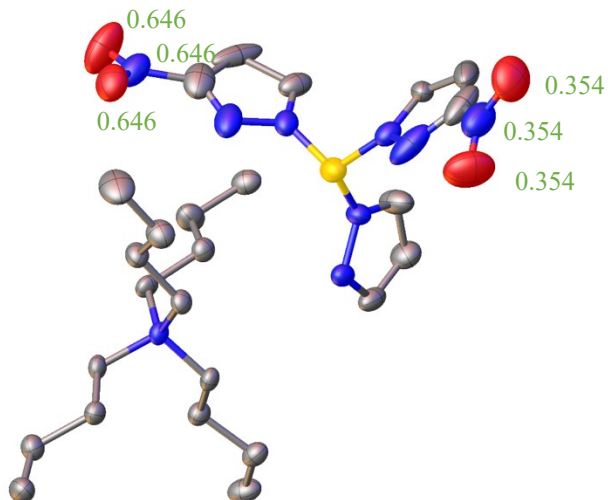

Figure 1. a). Solid-state structure of TBA[3-NO<sub>2</sub>Tp] showing only the lowest occupancy component of the disorder. b) Asymmetric unit of ligand TBA [3-NO<sub>2</sub>Tp] with indications of non-unit site occupancy. Thermal ellipsoids are shown at 50% probability. Color code: B, yellow; C, grey; N, blue; O, red. Hydrogen atoms are omitted for clarity.

### Solid-state structure of TBA[4-NO<sub>2</sub>Tp]

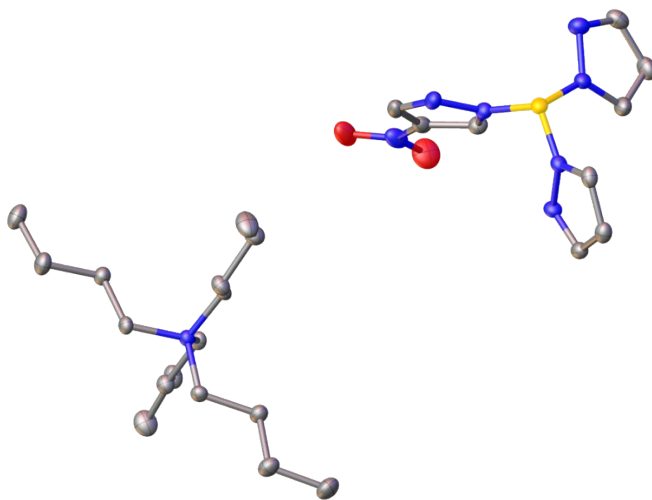

Figure 2. Solid-state structure of TBA[4-NO<sub>2</sub>Tp]. Thermal ellipsoids are shown at 50% probability. Color code: B, yellow; C, grey; N, blue; O, red. Hydrogen atoms are omitted for clarity.

### Solid-state structure of [(3-NO<sub>2</sub>Tp)<sub>2</sub>Fe]

a.)

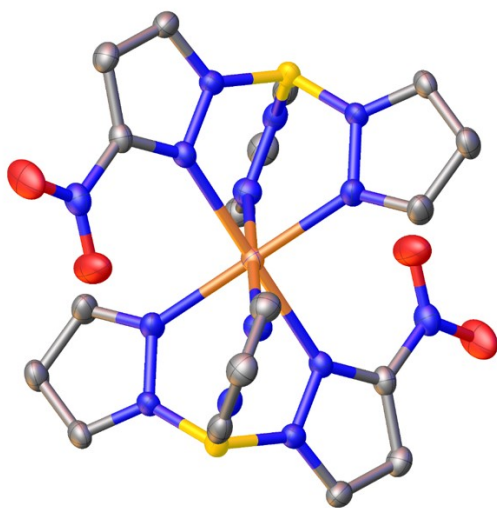

b.)

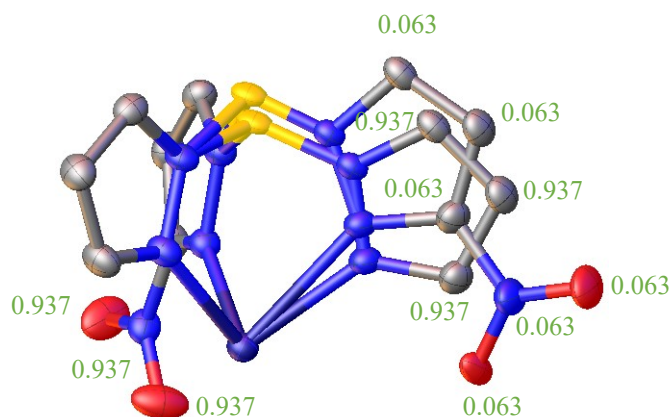

Figure 3. a). Solid-state structure of [(3-NO<sub>2</sub>Tp)<sub>2</sub>Fe], showing only the highest occupancy component of the disorder. b) Asymmetric unit of complex [(3-NO<sub>2</sub>Tp)<sub>2</sub>Fe], with indications of non-unit site occupancy. Thermal ellipsoids are shown at 50% probability. Color code: Fe, brown; B, yellow; C, grey; N, blue; O, red. Hydrogen atoms are omitted for clarity.

### Solid-state structure of [(Tp)Fe(3-NO<sub>2</sub>Tp)] · (C<sub>6</sub>H<sub>6</sub>)<sub>0.5</sub>

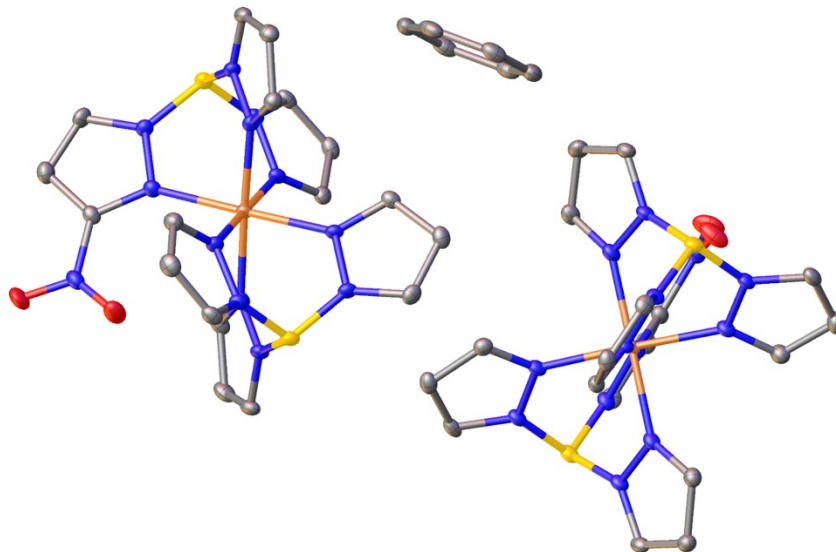

Figure 4. Solid-state structure of [(Tp)Fe(3-NO<sub>2</sub>Tp)] · (C<sub>6</sub>H<sub>6</sub>)<sub>0.5</sub>. Thermal ellipsoids are shown at 50% probability. Color code: Fe, brown; B, yellow; C, grey; N, blue; O, red. Hydrogen atoms are omitted for clarity.

### Solid-state structure of [(Tp)Fe(4-NO<sub>2</sub>Tp)]

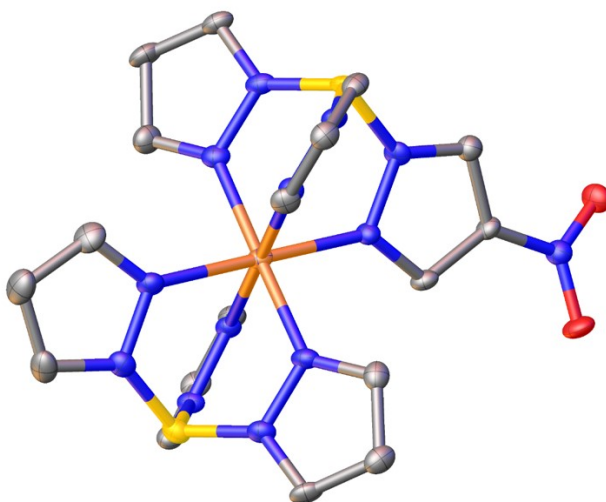

Figure 5. Solid-state structure of [(Tp)Fe(4-NO<sub>2</sub>Tp)]. Thermal ellipsoids are shown at 50% probability. Color code: Fe, brown; B, yellow; C, grey; N, blue; O, red. Hydrogen atoms are omitted for clarity.

### Solid-state structure of [(Tp)Fe(5-NO<sub>2</sub>Tp)] · (CH<sub>3</sub>CN)<sub>0.5</sub>

a.)

b.)

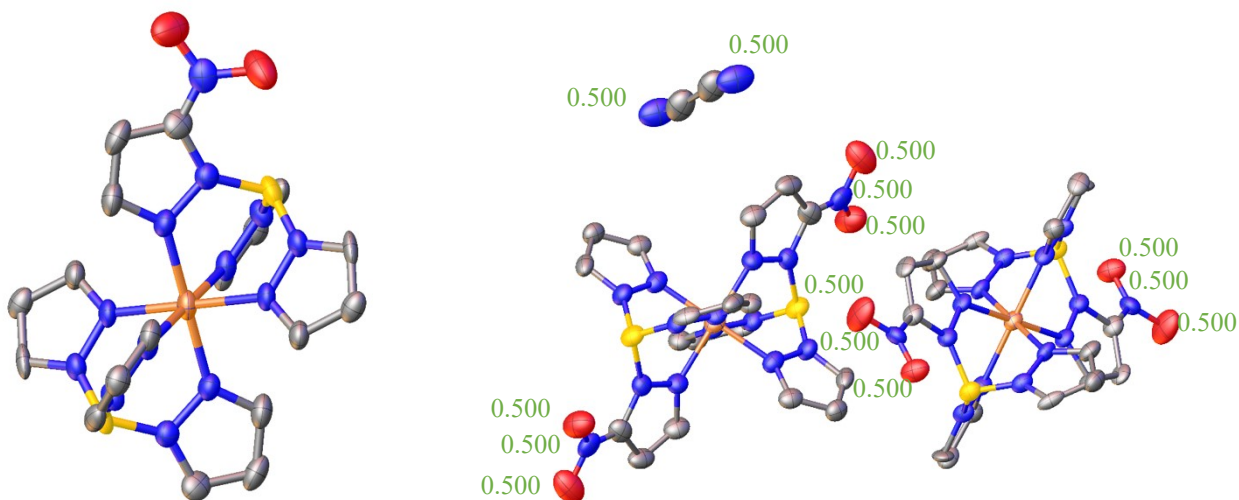

Figure 6. a.) Solid-state structure of [(Tp)Fe(5-NO<sub>2</sub>Tp)], showing only one component of the disorder. The co-crystallizing acetonitrile moiety is omitted for clarity. b.) Solid-state structure of complex [(Tp)Fe(5-NO<sub>2</sub>Tp)] · (CH<sub>3</sub>CN)<sub>0.5</sub> with indications of non-unit site occupancy. Thermal ellipsoids are shown at 50% probability. Color code: Fe, brown; B, yellow; C, grey; N, blue; O, red. Hydrogen atoms are omitted for clarity.

### Solid-state structure of $[((3\text{-NO}_2)_2\text{Tp})_2\text{Fe}]$

a.)

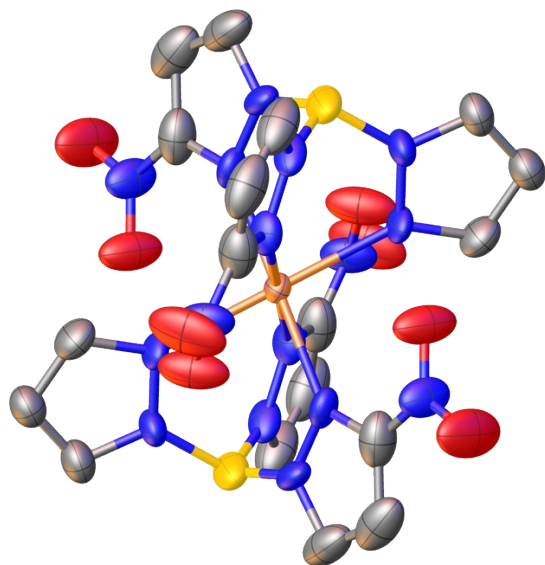

b.)

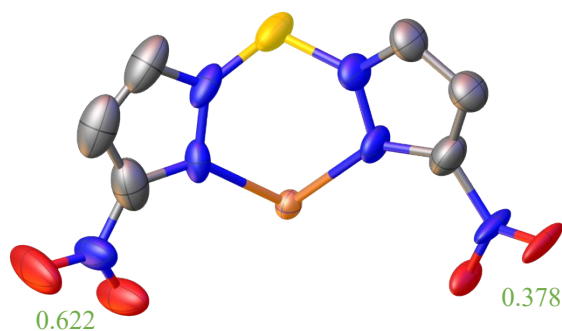

Figure 7. a). Solid-state structure of  $[((3\text{-NO}_2)_2\text{Tp})_2\text{Fe}]$ , showing only the highest occupancy component of the disorder. b) Asymmetric unit of complex  $[((3\text{-NO}_2)_2\text{Tp})_2\text{Fe}]$ , with indications of non-unit site occupancy. Thermal ellipsoids are shown at 50% probability. Color code: Fe, brown; B, yellow; C, grey; N, blue; O, red. Hydrogen atoms are omitted for clarity.

### Solid-state structure of $[((3\text{-NO}_2)_2\text{Tp})_2\text{Fe}] \cdot \text{CH}_2\text{Cl}_2$

a.)

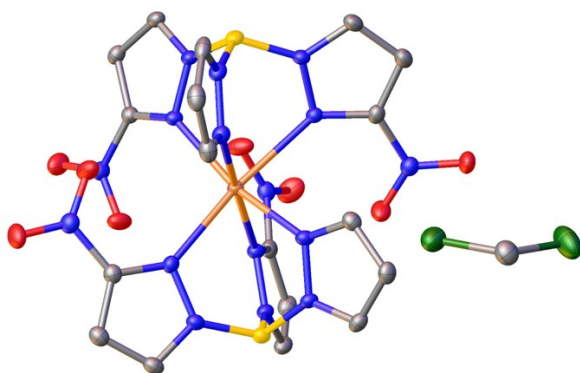

b.)

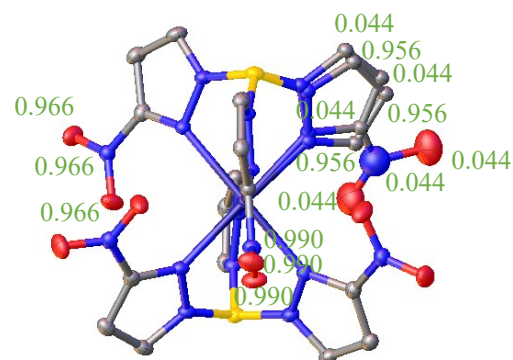

Figure 8. a). Solid-state structure of  $[((3\text{-NO}_2)_2\text{Tp})_2\text{Fe}] \cdot \text{CH}_2\text{Cl}_2$ , showing only the highest occupancy component of the disorder. b) Asymmetric unit of complex  $[((3\text{-NO}_2)_2\text{Tp})_2\text{Fe}] \cdot \text{CH}_2\text{Cl}_2$ , with indications of non-unit site occupancy. Thermal ellipsoids are shown at 50% probability. Color code: Fe, brown; B, yellow; C, grey; N, blue; O, red; Cl, green. Hydrogen atoms are omitted for clarity.

### Solid-state structure of $[(3\text{-NH}_2\text{Tp})_2\text{Fe}]$

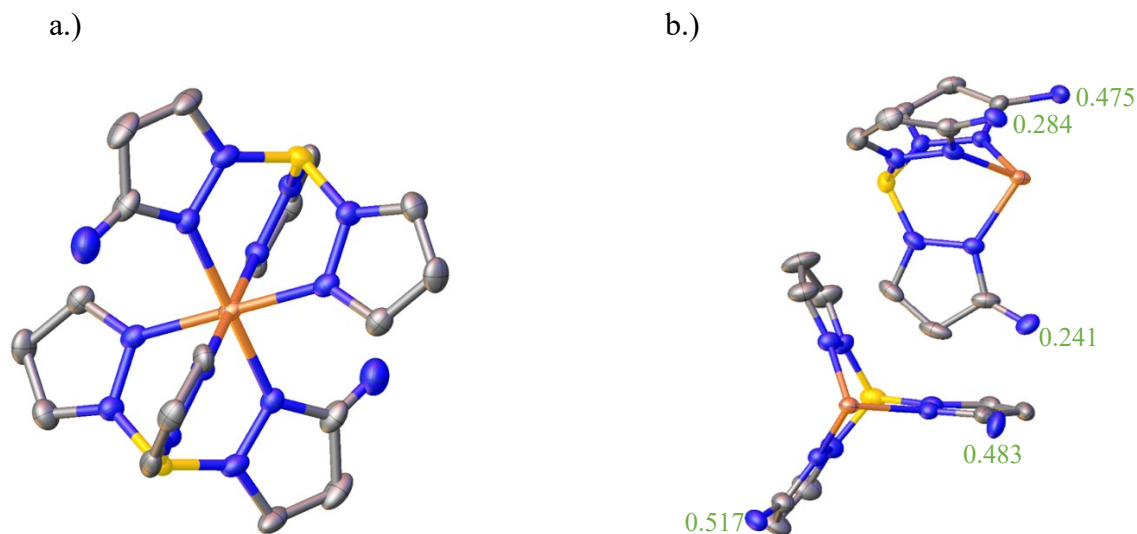

**Solid-state structure of  $[((3\text{-NH}_2)_2\text{Tp})_2\text{Fe}]$**

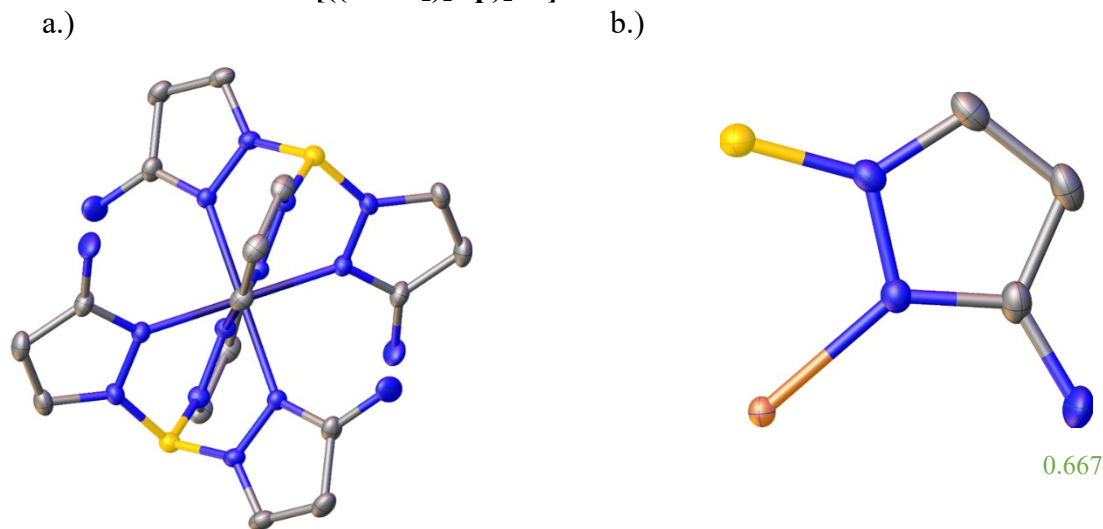

## X-ray crystallography

Table 1. Single-crystal X-ray diffraction analysis details of ligands

|                                           | TBA[3-NO <sub>2</sub> Tp]                                      | TBA[4-NO <sub>2</sub> Tp]                                      |
|-------------------------------------------|----------------------------------------------------------------|----------------------------------------------------------------|
| CCDC number                               | 2016677                                                        | 2016678                                                        |
| Formula                                   | C <sub>25</sub> H <sub>45</sub> BN <sub>8</sub> O <sub>2</sub> | C <sub>25</sub> H <sub>45</sub> BN <sub>8</sub> O <sub>2</sub> |
| Fw / g mol <sup>-1</sup>                  | 500.50                                                         | 500.50                                                         |
| Crystal size / mm <sup>3</sup>            | 0.31, 0.25, 0.12                                               | 0.71, 0.42, 0.24                                               |
| crystal system                            | monoclinic                                                     | monoclinic                                                     |
| space group                               | <i>P</i> 2 <sub>1</sub> / <i>n</i>                             | <i>P</i> 2 <sub>1</sub> / <i>n</i>                             |
| a / Å                                     | 12.034(2)                                                      | 9.9736(15)                                                     |
| b / Å                                     | 15.744(3)                                                      | 14.258(2)                                                      |
| c / Å                                     | 14.929(3)                                                      | 20.471(3)                                                      |
| α                                         | 90                                                             | 90                                                             |
| β                                         | 95.216(4)                                                      | 94.132(2)                                                      |
| γ                                         | 90                                                             | 90                                                             |
| V / Å <sup>3</sup>                        | 2816.9(8)                                                      | 2903.5(8)                                                      |
| Z                                         | 4                                                              | 4                                                              |
| ρ <sub>calc</sub> / g cm <sup>-3</sup>    | 1.178                                                          | 1.145                                                          |
| μ / mm <sup>-1</sup>                      | 0.077                                                          | 0.075                                                          |
| λ / Å                                     | Mo Kα (0.71073)                                                | Mo Kα (0.71073)                                                |
| T / K                                     | 298(2)                                                         | 100(2)                                                         |
| 2θ <sub>max</sub>                         | 51.6°                                                          | 54.3°                                                          |
| reflections collected                     | 17918                                                          | 20405                                                          |
| independent reflections                   | 4872                                                           | 5101                                                           |
| parameters                                | 358                                                            | 330                                                            |
| R(int)                                    | 0.0461                                                         | 0.0538                                                         |
| R1 [I > 2σ(I)]                            | 0.0805                                                         | 0.0449                                                         |
| wR2 (all data)                            | 0.2305                                                         | 0.1197                                                         |
| Largest peak and hole / e Å <sup>-3</sup> | 0.540, -0.456                                                  | 0.242, -0.263                                                  |

|  |                                          |                                |                                |                                |                                |                                                          |
|--|------------------------------------------|--------------------------------|--------------------------------|--------------------------------|--------------------------------|----------------------------------------------------------|
|  | [(3-NO <sub>2</sub> Tp) <sub>2</sub> Fe] | [(Tp)Fe(3-NO <sub>2</sub> Tp)] | [(Tp)Fe(4-NO <sub>2</sub> Tp)] | [(Tp)Fe(5-NO <sub>2</sub> Tp)] | [(Tp)Fe(5-NO <sub>2</sub> Tp)] | [((3-NO <sub>2</sub> ) <sub>2</sub> Tp) <sub>2</sub> Fe] |
|--|------------------------------------------|--------------------------------|--------------------------------|--------------------------------|--------------------------------|----------------------------------------------------------|

|                                           |                                                                 |                                                                 |                                                                 |                                                                          |                                                                     |                                                                 |
|-------------------------------------------|-----------------------------------------------------------------|-----------------------------------------------------------------|-----------------------------------------------------------------|--------------------------------------------------------------------------|---------------------------------------------------------------------|-----------------------------------------------------------------|
|                                           |                                                                 | $\cdot(\text{C}_6\text{H}_6)_{0.5}$                             |                                                                 | $\cdot(\text{CH}_3\text{CN})_{0.5}$                                      | $\cdot(\text{CH}_3\text{CN})_{0.5}$                                 |                                                                 |
| CCDC number                               | 2017277                                                         | 2017280                                                         | 2018041                                                         | 2024174                                                                  | 2019476                                                             | 2109964                                                         |
| Formula                                   | $\text{C}_{18}\text{H}_{18}\text{B}_2\text{FeN}_{14}\text{O}_4$ | $\text{C}_{21}\text{H}_{22}\text{B}_2\text{FeN}_{13}\text{O}_2$ | $\text{C}_{18}\text{H}_{19}\text{B}_2\text{FeN}_{13}\text{O}_2$ | $\text{C}_{38}\text{H}_{41}\text{B}_4\text{Fe}_2\text{N}_{27}\text{O}_4$ | $\text{C}_{19}\text{H}_{20.5}\text{B}_2\text{FeN}_{13.5}\text{O}_2$ | $\text{C}_{18}\text{H}_{16}\text{B}_2\text{FeN}_{16}\text{O}_8$ |
| Fw / g mol <sup>-1</sup>                  | 571.93                                                          | 565.98                                                          | 526.93                                                          | 1094.92                                                                  | 547.46                                                              | 661.98                                                          |
| Crystal size / mm <sup>3</sup>            | 0.13, 0.82, 0.58                                                | 0.15, 0.91, 0.17                                                | 0.066, 0.17, 0.291                                              | 0.12, 0.34, 0.15                                                         | 0.16, 0.42, 0.07                                                    | 0.20, 0.12, 0.07                                                |
| crystal system                            | triclinic                                                       | monoclinic                                                      | monoclinic                                                      | monoclinic                                                               | monoclinic                                                          | orthorhombic                                                    |
| space group                               | <i>P</i> -1                                                     | <i>P</i> 2 <sub>1</sub> / <i>c</i>                              | <i>P</i> 2 <sub>1</sub> / <i>c</i>                              | <i>C</i> 2/ <i>c</i>                                                     | <i>C</i> 2/ <i>c</i>                                                | <i>Cmce</i>                                                     |
| a / Å                                     | 7.4826(19)                                                      | 7.6174(5)                                                       | 7.5560(19)                                                      | 15.695(3)                                                                | 15.9020(13)                                                         | 13.482(3)                                                       |
| b / Å                                     | 8.807(2)                                                        | 16.9017(11)                                                     | 18.433(5)                                                       | 17.914(4)                                                                | 18.1587(17)                                                         | 13.205(3)                                                       |
| c / Å                                     | 9.755(3)                                                        | 19.3438(13)                                                     | 17.133(4)                                                       | 17.381(4)                                                                | 17.5671(17)                                                         | 15.403(4)                                                       |
| α                                         | 95.359(3)                                                       | 90                                                              | 90                                                              | 90                                                                       | 90                                                                  | 90                                                              |
| β                                         | 103.741(3)                                                      | 99.313(1)                                                       | 99.585(3)                                                       | 97.507(5)                                                                | 97.715(3)                                                           | 90                                                              |
| γ                                         | 101.365(3)                                                      | 90                                                              | 90                                                              | 90                                                                       | 90                                                                  | 90                                                              |
| V / Å <sup>3</sup>                        | 605.5(3)                                                        | 2457.6(3)                                                       | 2353.0(10)                                                      | 4845.0(18)                                                               | 5026.8(8)                                                           | 2742.2(11)                                                      |
| Z                                         | 1                                                               | 4                                                               | 4                                                               | 4                                                                        | 8                                                                   | 4                                                               |
| ρ <sub>calc</sub> / g cm <sup>-3</sup>    | 1.568                                                           | 1.530                                                           | 1.488                                                           | 1.501                                                                    | 1.447                                                               | 1.603                                                           |
| μ / mm <sup>-1</sup>                      | 0.681                                                           | 0.664                                                           | 0.687                                                           | 0.671                                                                    | 0.647                                                               | 0.626                                                           |
| λ / Å                                     | Mo Kα (0.71073)                                                 | Mo Kα (0.71073)                                                 | Mo Kα (0.71073)                                                 | Mo Kα (0.71073)                                                          | Mo Kα (0.71073)                                                     | Mo Kα (0.71073)                                                 |
| T / K                                     | 100(2)                                                          | 100(2)                                                          | 100(2)                                                          | 100(2)                                                                   | 298(2)                                                              | 298(2)                                                          |
| 2θ <sub>max</sub>                         | 54.5°                                                           | 51.5°                                                           | 52.9°                                                           | 43.0°                                                                    | 66.3°                                                               | 51.3°                                                           |
| reflections collected                     | 10828                                                           | 20406                                                           | 14164                                                           | 25167                                                                    | 73381                                                               | 9924                                                            |
| independent reflections                   | 2719                                                            | 4702                                                            | 4807                                                            | 2444                                                                     | 5967                                                                | 1311                                                            |
| parameters                                | 224                                                             | 550                                                             | 325                                                             | 378                                                                      | 381                                                                 | 136                                                             |
| R(int)                                    | 0.0425                                                          | 0.0301                                                          | 0.0458                                                          | 0.0970                                                                   | 0.1675                                                              | 0.0377                                                          |
| R1 [I > 2σ(I)]                            | 0.0342                                                          | 0.0173                                                          | 0.0688                                                          | 0.0542                                                                   | 0.0869                                                              | 0.0953                                                          |
| wR2 (all data)                            | 0.0796                                                          | 0.0321                                                          | 0.1891                                                          | 0.1275                                                                   | 0.2026                                                              | 0.1852                                                          |
| Largest peak and hole / e Å <sup>-3</sup> | 0.358, -0.276                                                   | 0.269, -0.205                                                   | 1.694, -1.690                                                   | 0.358, -0.303                                                            | 0.289, -0.302                                                       | 0.766, -0.501                                                   |



|                                           | $[(3\text{-NO}_2)_2\text{Tp}]_2\text{Fe} \cdot \text{CH}_2\text{Cl}_2$                           | $[(3\text{-NH}_2\text{Tp})_2\text{Fe}]$               | $[(3\text{-NH}_2\text{Tp})_2\text{Fe}]$               | $[(3\text{-NH}_2)_2\text{Tp}]_2\text{Fe}$             | $[(3\text{-NH}_2)_2\text{Tp}]_2\text{Fe}$             |
|-------------------------------------------|--------------------------------------------------------------------------------------------------|-------------------------------------------------------|-------------------------------------------------------|-------------------------------------------------------|-------------------------------------------------------|
| CCDC number                               | 2017281                                                                                          | 2018042                                               | 2018043                                               | 2017278                                               | 2017279                                               |
| Formula                                   | $\text{C}_{18}\text{H}_{16}\text{B}_2\text{FeN}_{16}\text{O}_8, (\text{CH}_2\text{Cl}_2)_{0.91}$ | $\text{C}_{18}\text{H}_{22}\text{B}_2\text{FeN}_{14}$ | $\text{C}_{18}\text{H}_{22}\text{B}_2\text{FeN}_{14}$ | $\text{C}_{18}\text{H}_{24}\text{B}_2\text{FeN}_{16}$ | $\text{C}_{18}\text{H}_{24}\text{B}_2\text{FeN}_{16}$ |
| Fw / g mol <sup>-1</sup>                  | 739.22                                                                                           | 511.48                                                | 511.96                                                | 542.00                                                | 542.00                                                |
| Crystal size / mm <sup>3</sup>            | 0.43, 0.28, 0.36                                                                                 | 0.062, 0.21, 0.32                                     | 0.062, 0.21, 0.32                                     | 0.21, 0.51, 0.25                                      | 0.21, 0.51, 0.25                                      |
| crystal system                            | monoclinic                                                                                       | triclinic                                             | triclinic                                             | trigonal                                              | trigonal                                              |
| space group                               | $P2_1/c$                                                                                         | $P-1$                                                 | $P-1$                                                 | $R-3$                                                 | $R-3$                                                 |
| a / Å                                     | 15.7878(7)                                                                                       | 9.2821(12)                                            | 9.439(3)                                              | 9.093(2)                                              | 9.174(2)                                              |
| b / Å                                     | 9.5340(5)                                                                                        | 10.1947(13)                                           | 10.374(3)                                             | 9.093(2)                                              | 9.174(2)                                              |
| c / Å                                     | 19.5945(10)                                                                                      | 13.4103(17)                                           | 13.566(4)                                             | 25.043(2)                                             | 26.393(2)                                             |
| $\alpha$                                  | 90                                                                                               | 85.767(3)                                             | 85.264(4)                                             | 90                                                    | 90                                                    |
| $\beta$                                   | 99.2920(10)                                                                                      | 80.397(3)                                             | 80.233(4)                                             | 90                                                    | 90                                                    |
| $\gamma$                                  | 90                                                                                               | 63.053(3)                                             | 63.663(4)                                             | 120                                                   | 120                                                   |
| V / Å <sup>3</sup>                        | 2910.7(2)                                                                                        | 1115.4(2)                                             | 1173.2(6)                                             | 1793.3(2)                                             | 1923.8(2)                                             |
| Z                                         | 4                                                                                                | 2                                                     | 2                                                     | 3                                                     | 3                                                     |
| $\rho_{\text{calc}} / \text{g cm}^{-3}$   | 1.687                                                                                            | 1.523                                                 | 1.449                                                 | 1.506                                                 | 1.404                                                 |
| $\mu / \text{mm}^{-1}$                    | 0.778                                                                                            | 0.717                                                 | 0.682                                                 | 0.676                                                 | 0.630                                                 |
| $\lambda / \text{Å}$                      | Mo K $\alpha$ (0.71073)                                                                          | Mo K $\alpha$ (0.71073)                               | Mo K $\alpha$ (0.71073)                               | Mo K $\alpha$ (0.71073)                               | Mo K $\alpha$ (0.71073)                               |
| T / K                                     | 100(2)                                                                                           | 100(2)                                                | 298 (2)                                               | 100(2)                                                | 298 (2)                                               |
| 2 $\theta$ max                            | 54.3°                                                                                            | 52.8°                                                 | 50.9°                                                 | 72.7°                                                 | 61.1°                                                 |
| reflections collected                     | 45979                                                                                            | 29668                                                 | 10705                                                 | 13794                                                 | 11006                                                 |
| independent reflections                   | 6423                                                                                             | 4572                                                  | 4347                                                  | 8416                                                  | 1306                                                  |
| parameters                                | 498                                                                                              | 356                                                   | 357                                                   | 62                                                    | 63                                                    |
| R(int)                                    | 0.0497                                                                                           | 0.0429                                                | 0.0242                                                | 0.0372                                                | 0.0232                                                |
| R1 [I > 2 $\sigma$ (I)]                   | 0.0316                                                                                           | 0.0705                                                | 0.0587                                                | 0.0374                                                | 0.0318                                                |
| wR2 (all data)                            | 0.0788                                                                                           | 0.1697                                                | 0.1448                                                | 0.0991                                                | 0.0942                                                |
| Largest peak and hole / e Å <sup>-3</sup> | 0.698, -0.588                                                                                    | 0.478, -0.489                                         | 0.332, -0.260                                         | 0.926, -0.891                                         | 0.257, -0.232                                         |

**Solid-state packing in all compounds**  
**Packing of TBA[3-NO<sub>2</sub>Tp] in the crystal lattice.**

a.)

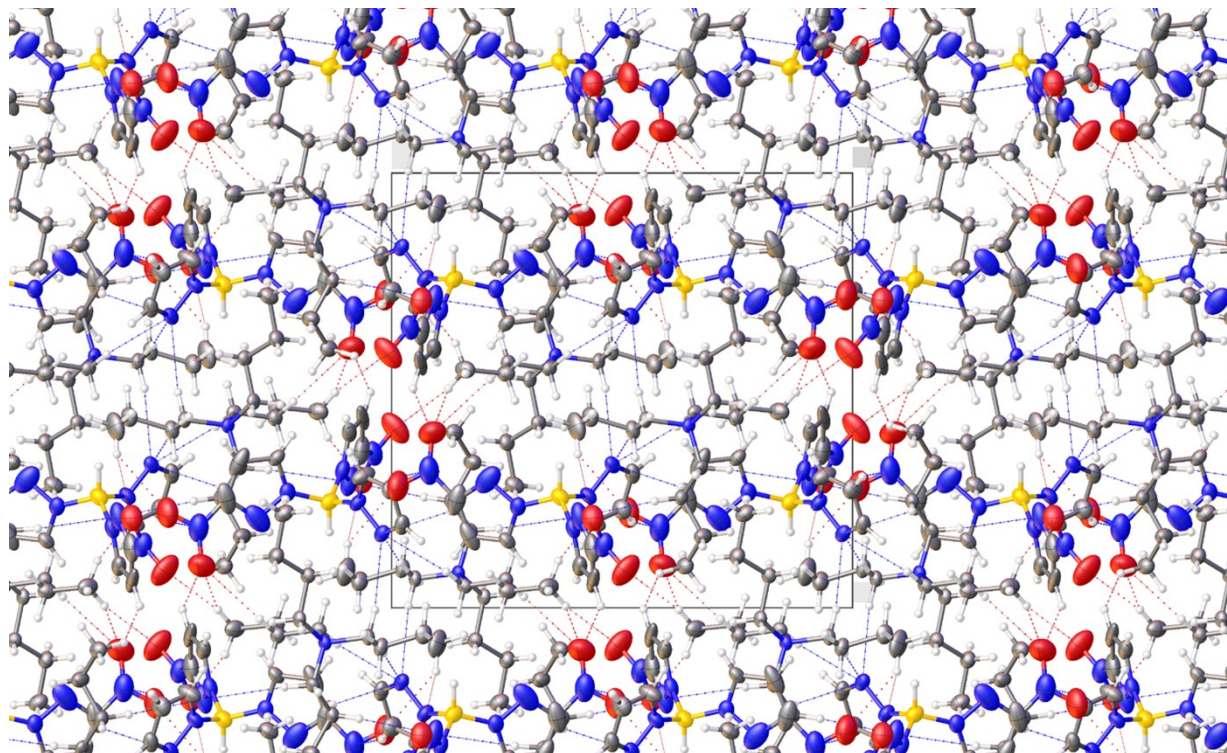

b.)

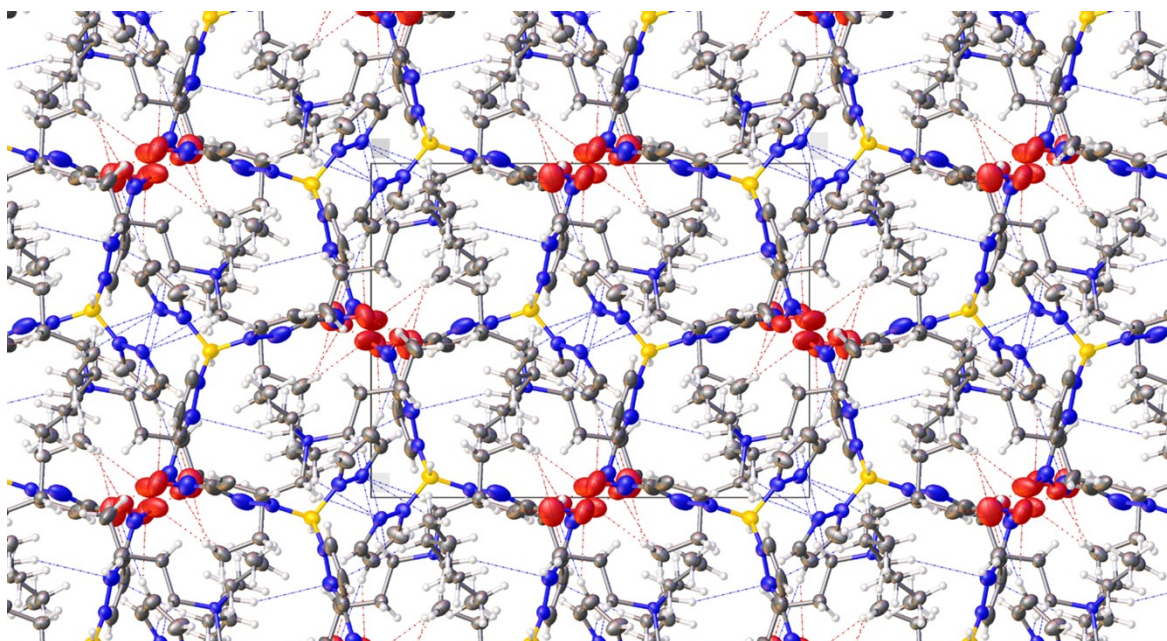

Figure 11. Non-classical hydrogen bonds are observed between 1.) oxygen positions of disordered nitro group and TBA<sup>+</sup> hydrogen site with donor...acceptor distances of 2.236-2.831 Å. 2.) nitrogen position of pyrazole and TBA<sup>+</sup> hydrogen site with donor...acceptor distances of 2.717-2.851 Å. 3.) oxygen positions of disordered nitro group and pyrazole hydrogen site with donor...acceptor distances of 2.540 Å. 4.) nitrogen position of disordered nitro group and pyrazole hydrogen site with donor...acceptor distances of 2.815 Å. a.) Projection along [100]. b.) Projection along [001].

**Packing of TBA[4-NO<sub>2</sub>Tp] in the crystal lattice.**

a.)

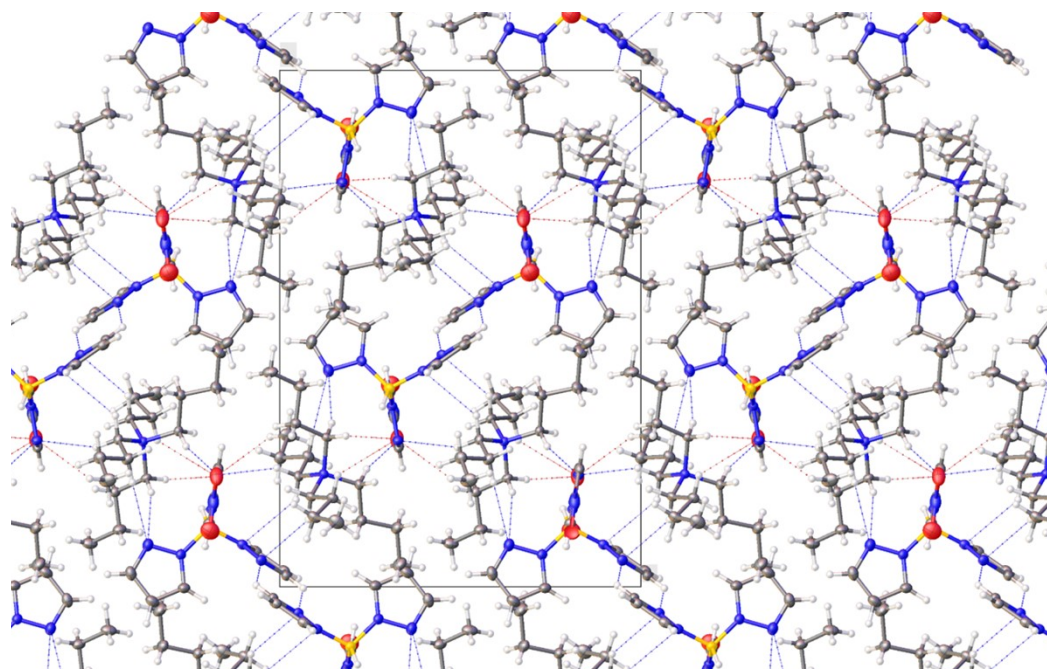

b.)

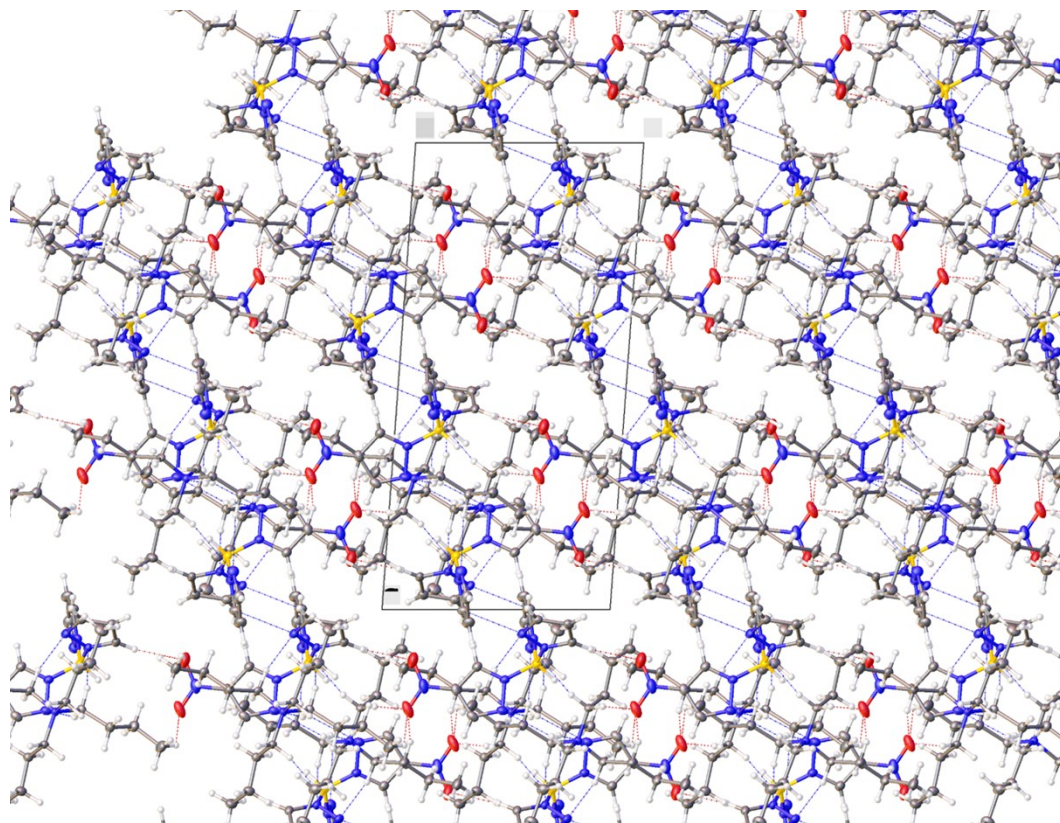

Figure 12. Non-classical hydrogen bonds are observed between 1.) oxygen positions of nitro group and TBA<sup>+</sup> hydrogen site with donor...acceptor distances of 2.494-2.750 Å. 2.) nitrogen position of pyrazole and TBA<sup>+</sup> hydrogen site with donor...acceptor distances of 2.673-2.757 Å. 3.) oxygen positions of nitro group and pyrazole hydrogen site with donor...acceptor distances of 2.680 Å. a.) Projection along [100]. b.) Projection along [010].

**Packing of [(3-NO<sub>2</sub>Tp)<sub>2</sub>Fe] in the crystal lattice.**

a.)

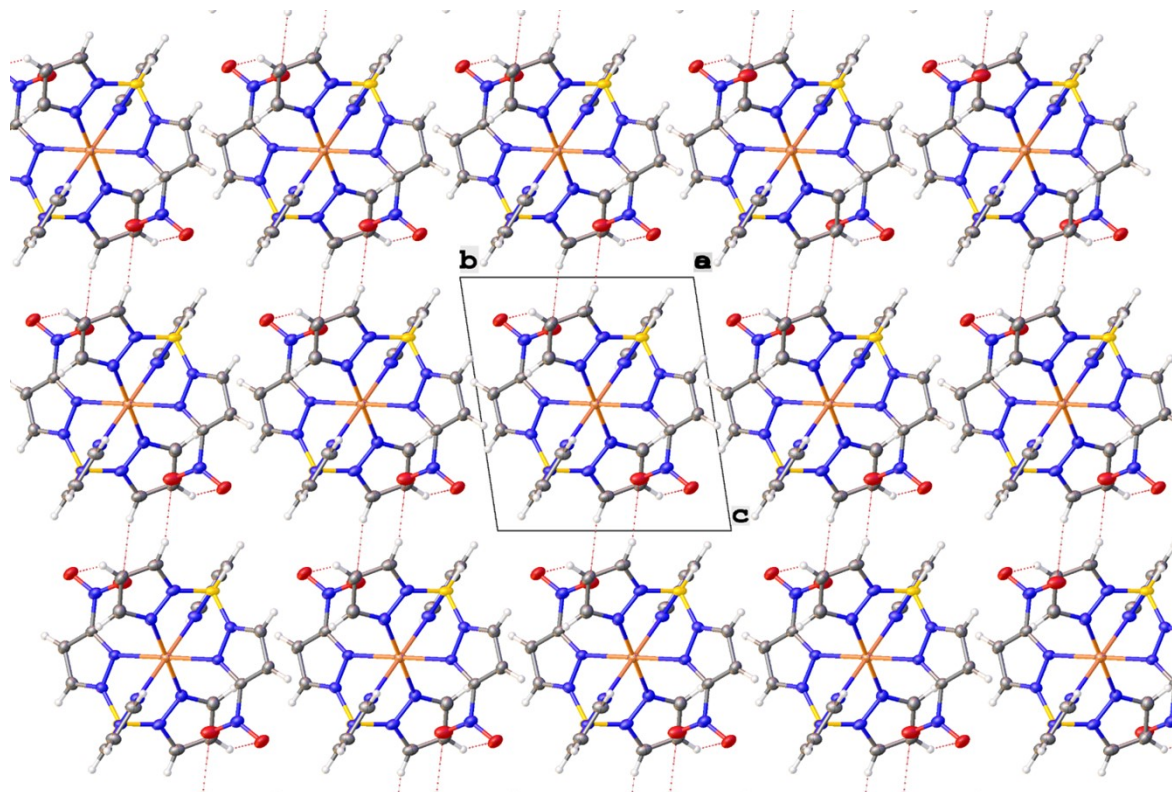

a.)

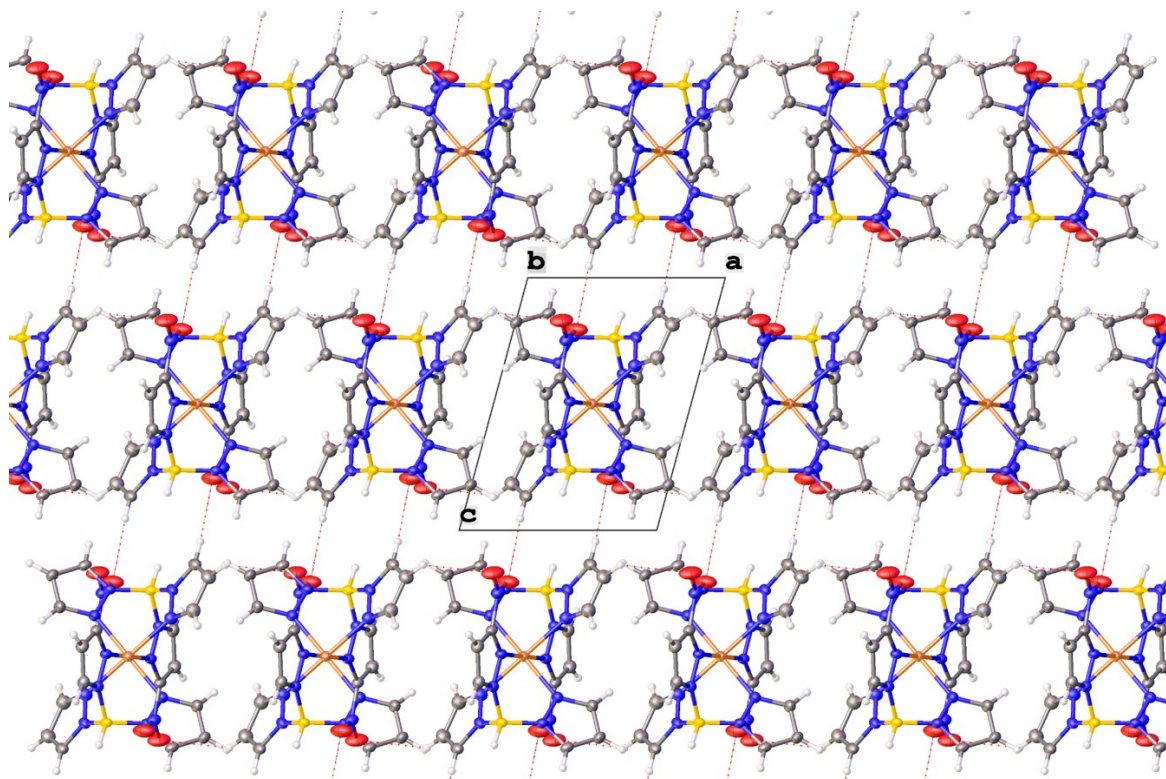

Figure 13. Non-classical hydrogen bonds are observed between oxygen positions of nitro group and pyrazole hydrogen site with donor...acceptor distances of 2.422-2.709 Å. a). Projection along [100]. b). Projection along [010].

**Packing of [(Tp)Fe(3-NO<sub>2</sub>Tp)]·(C<sub>6</sub>H<sub>6</sub>)<sub>0.5</sub> in the crystal lattice.**

a.)

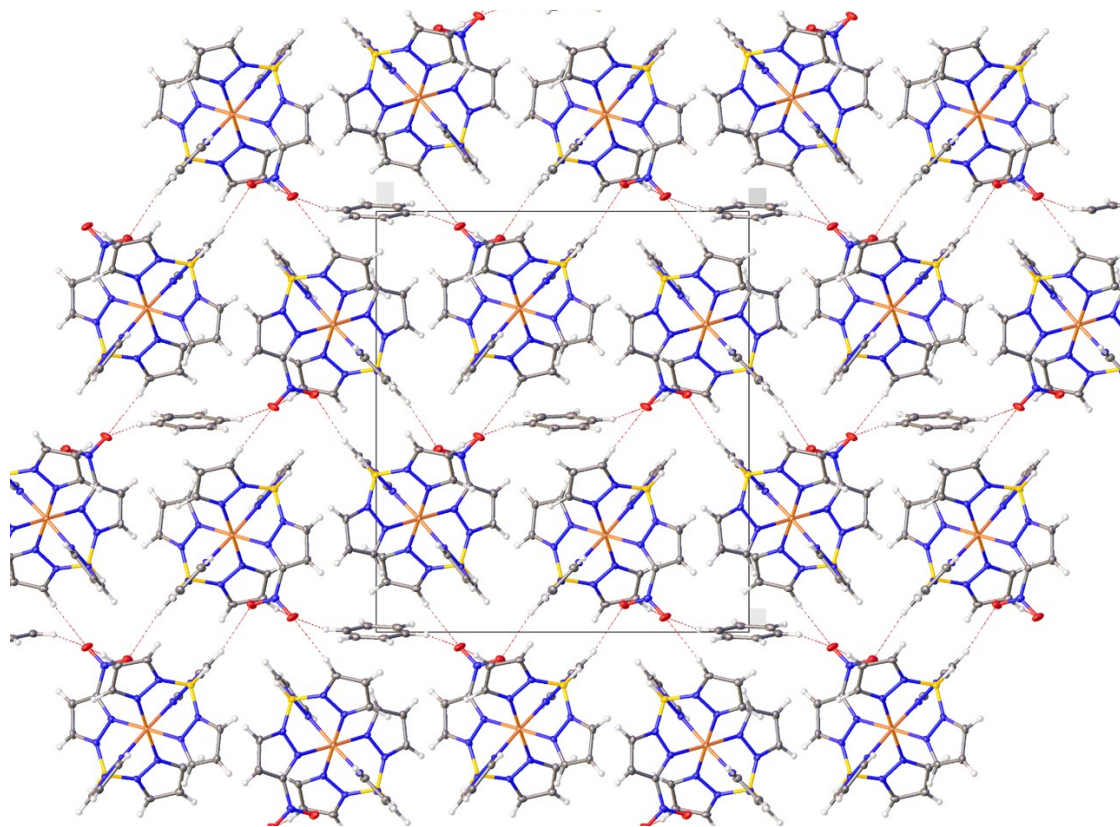

b.)

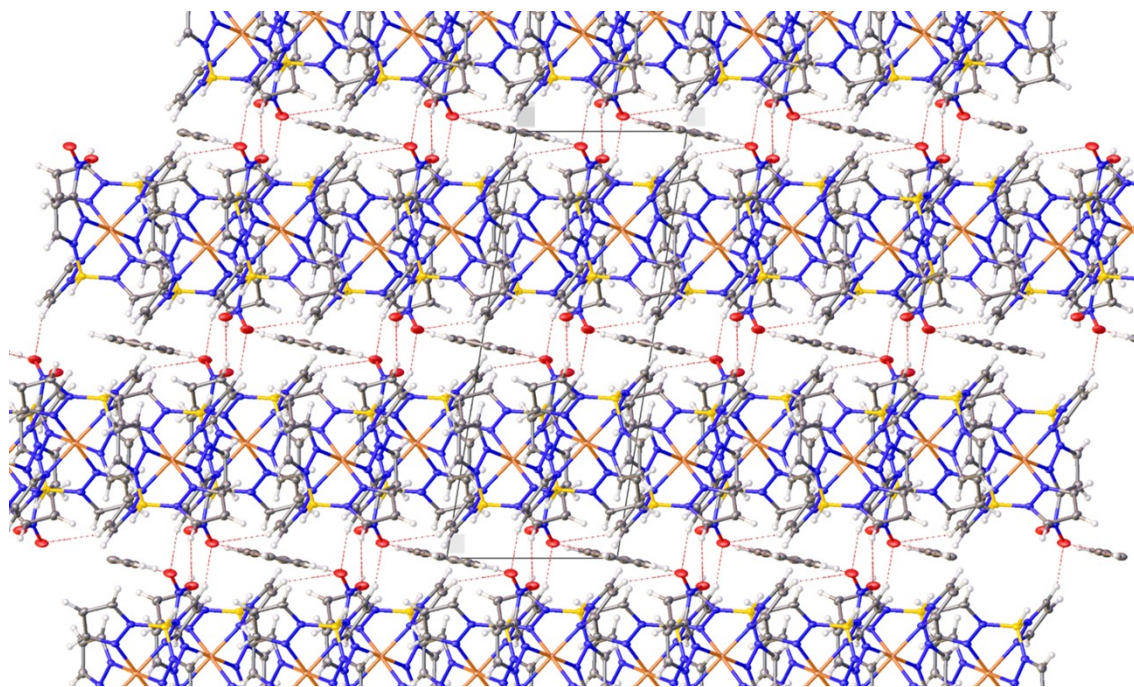

Figure 14. Non-classical hydrogen bonds are observed between 1.) oxygen positions of nitro group and benzene hydrogen site with donor $\cdots$ acceptor distances of 2.839 Å. 2.) oxygen positions of nitro group and pyrazole hydrogen site with donor $\cdots$ acceptor distances of 2.501-2.663 Å. a.) Projection along [100]. b.) Projection along [010].

**Packing of [(Tp)Fe(4-NO<sub>2</sub>Tp)] in the crystal lattice.**

a.)

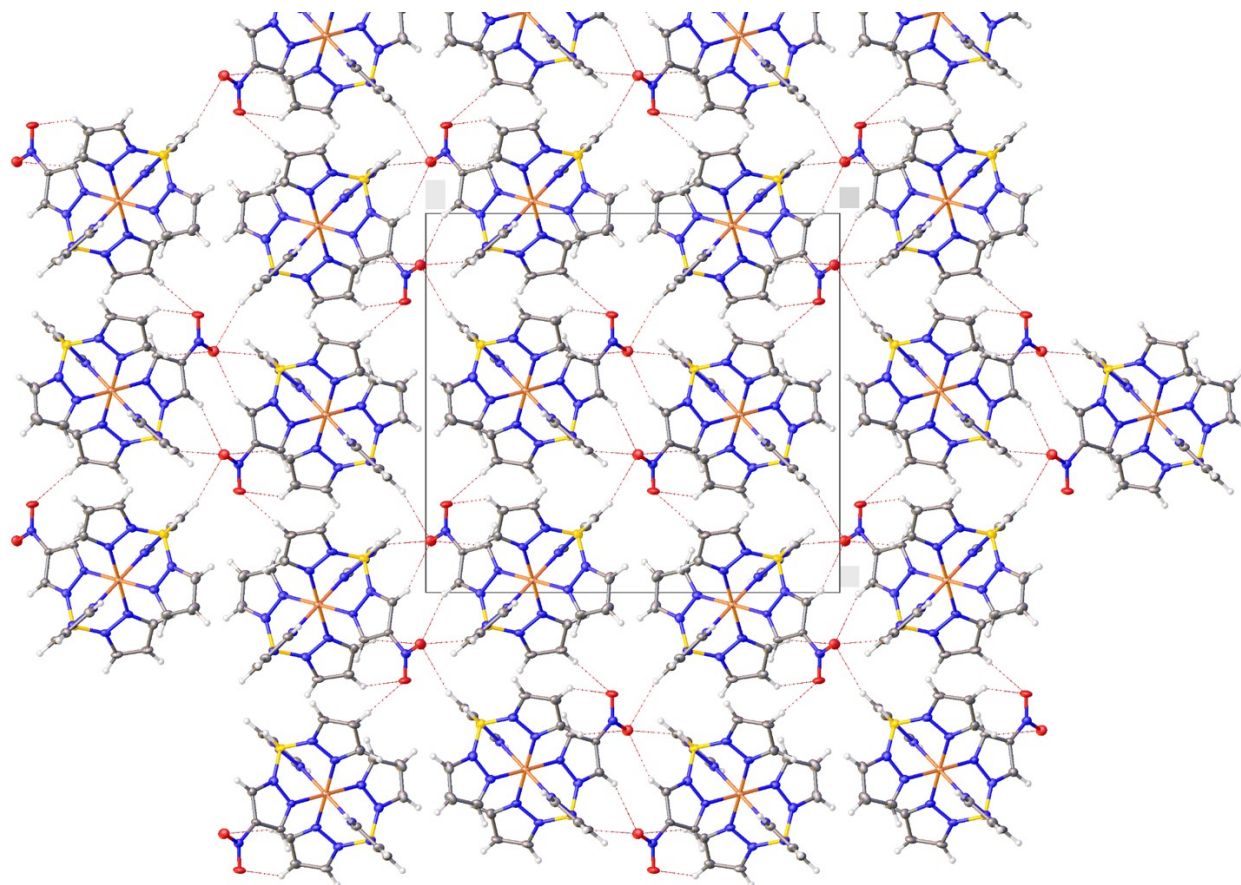

b.)

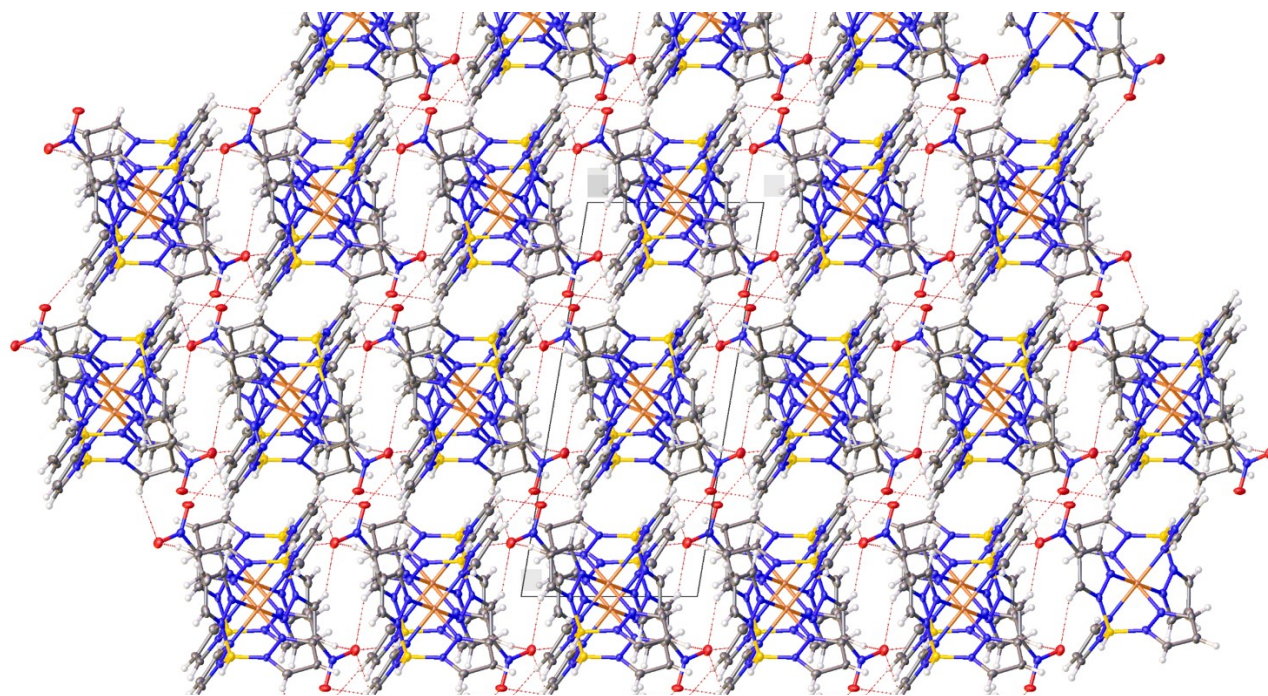

Figure 15. Non-classical hydrogen bonds are observed between oxygen positions of nitro group and pyrazole hydrogen site with donor...acceptor distances of 2.482-2.663 Å. a). Projection along [100]. b). Projection along [010].

**Packing of [(Tp)Fe(5-NO<sub>2</sub>Tp)]·(CH<sub>3</sub>CN)<sub>0.5</sub> in the crystal lattice.**

a.)

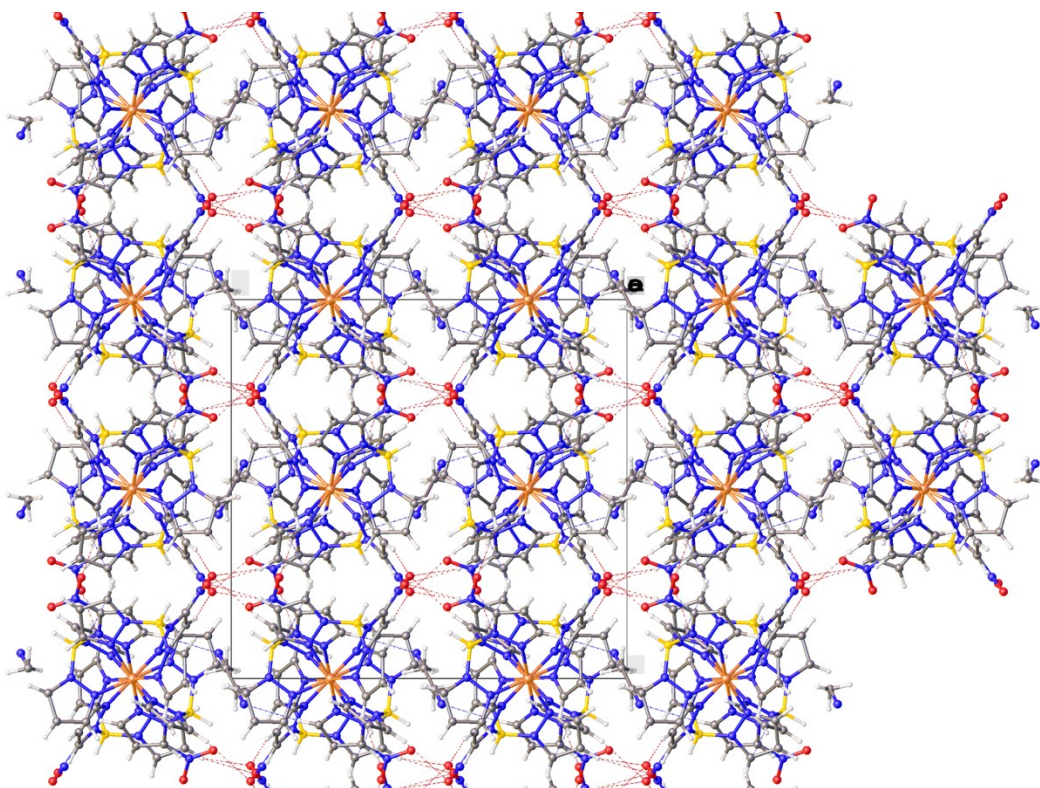

b.)

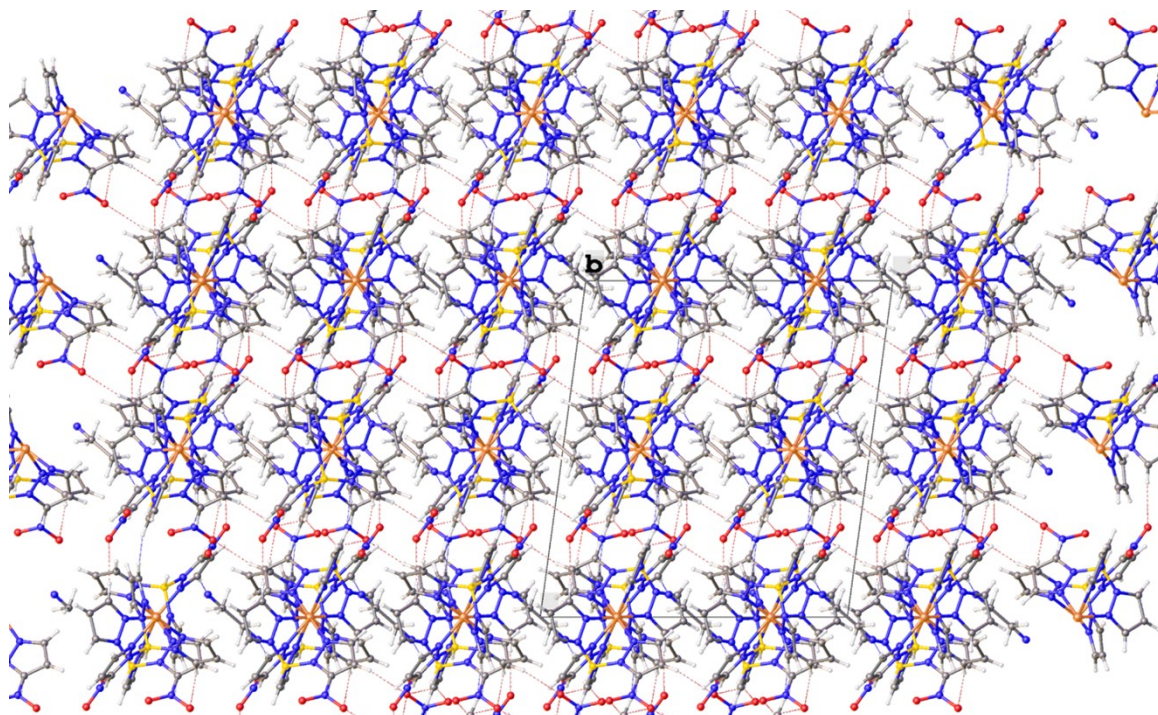

Figure 16. Non-classical hydrogen bonds are observed between 1). oxygen positions of nitro group and pyrazole hydrogen site with donor...acceptor distances of 2.426-2.752 Å. 2). nitrogen position of disordered acetonitrile and pyrazole hydrogen site with donor...acceptor distances of 2.690 Å. 3). nitrogen position of pyrazole and pyrazole hydrogen site with donor...acceptor distances of 2.866 Å. a). Projection along [100]. b). Projection along [010].



## Packing of $[(3\text{-NO}_2)_2\text{Tp}]_2\text{Fe}$ in the crystal lattice.

a.)

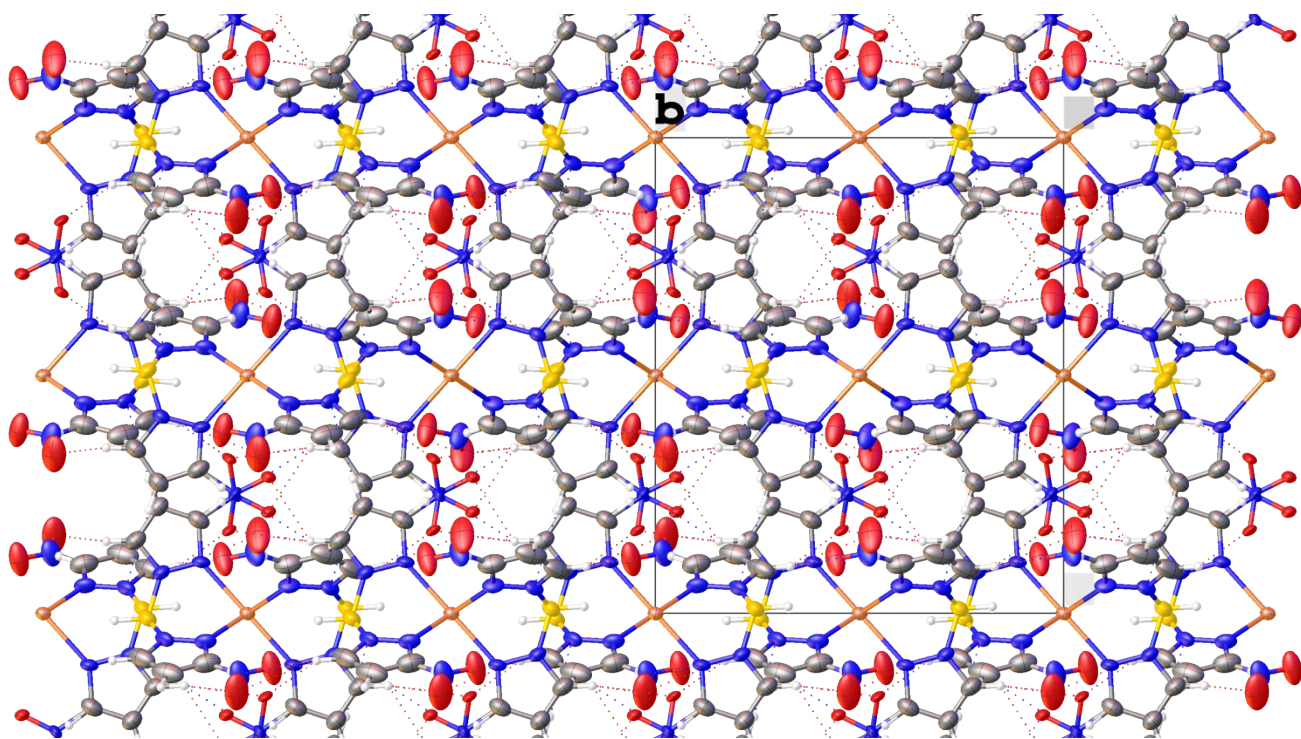

b.)

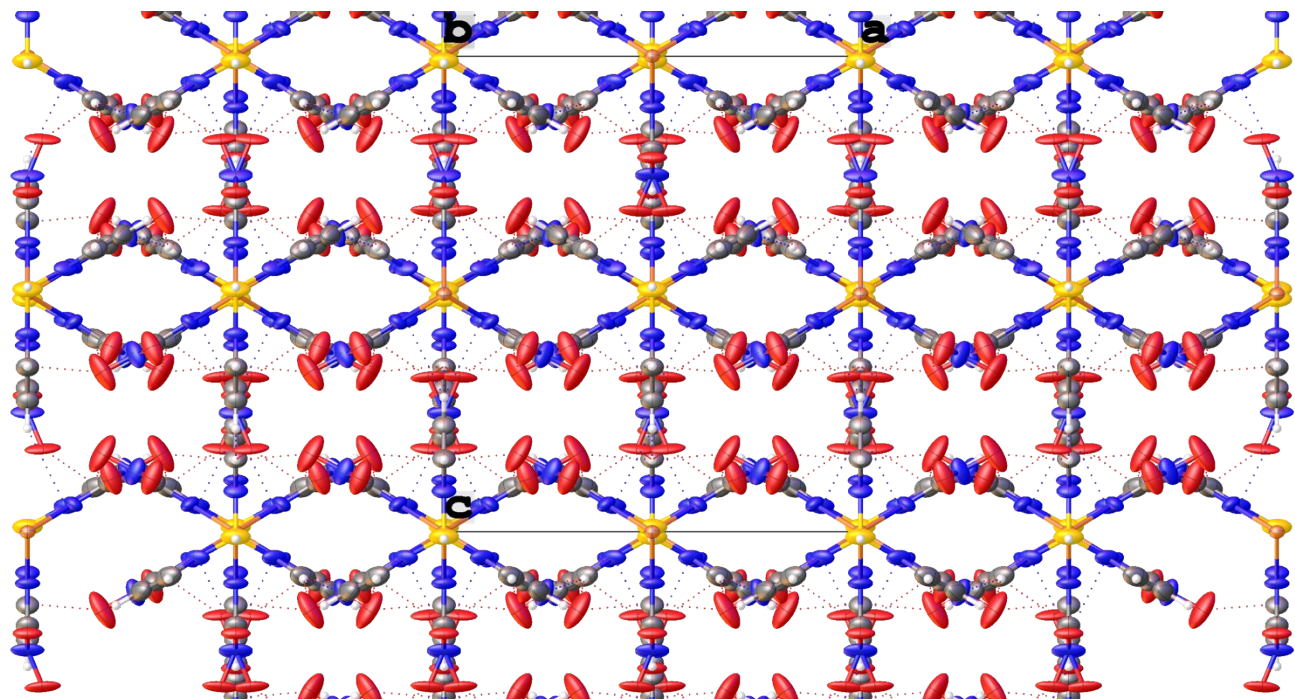

Figure 17. Non-classical hydrogen bonds are observed between 1). oxygen positions of nitro group and pyrazole hydrogen site with donor...acceptor distances of 2.486-2.964 Å. 2). nitrogen position of nitro group and pyrazole hydrogen site with donor...acceptor distances of 2.852-2.893 Å. 3). nitrogen position of pyrazole and pyrazole hydrogen site with donor...acceptor distances of 2.904 Å. a). Projection along [100]. b). Projection along [010].

## Packing of $[(3\text{-NO}_2)_2\text{Tp}]_2\text{Fe}\cdot\text{CH}_2\text{Cl}_2$ in the crystal lattice.

a.)

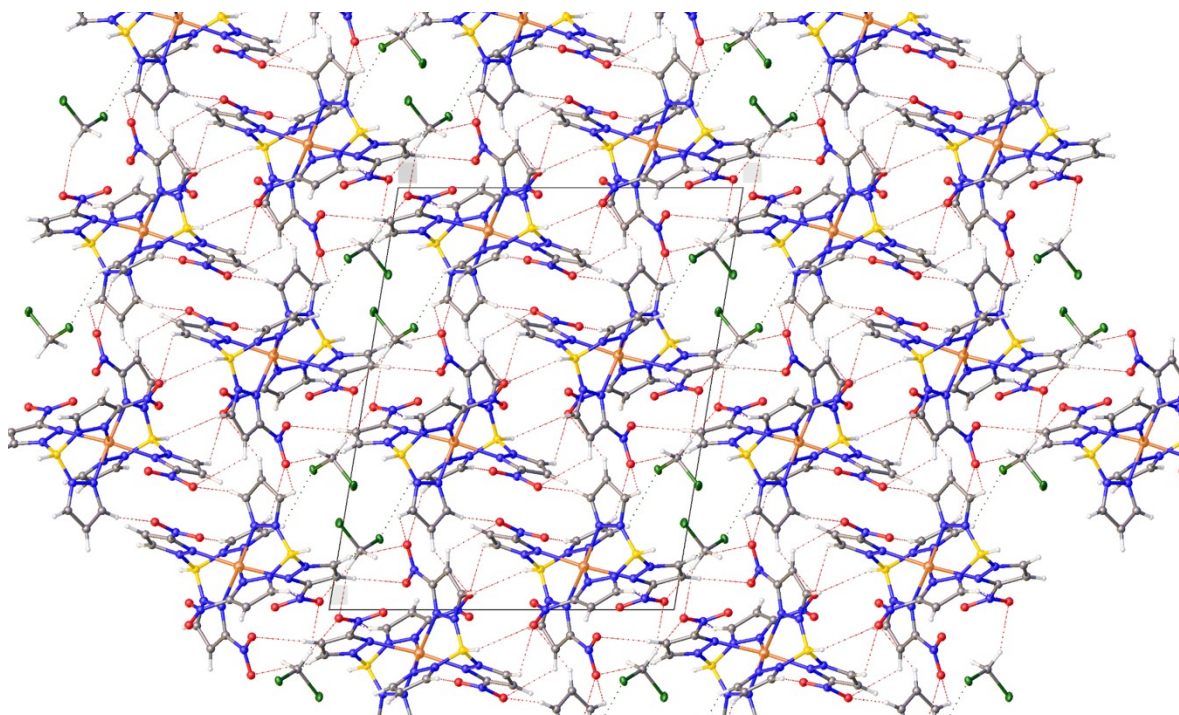

b.)

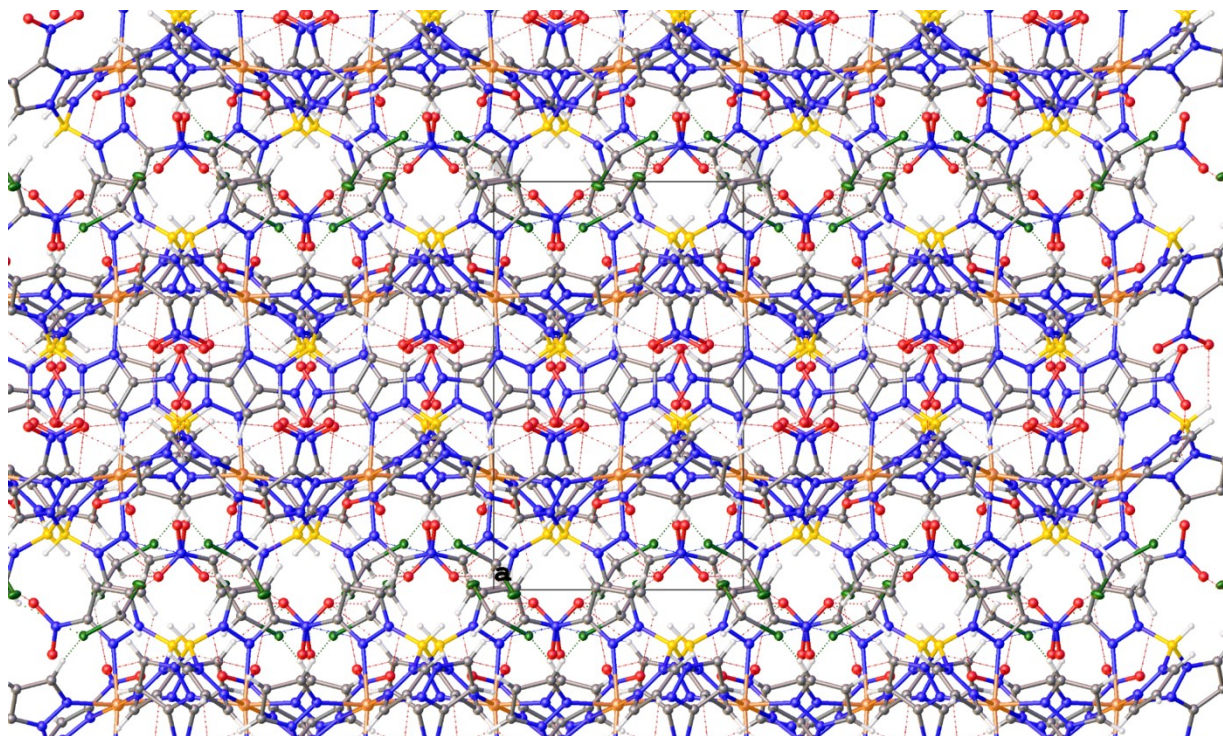

Figure 18. Non-classical hydrogen bonds are observed between 1.) chloride positions of dichloromethane and pyrazole hydrogen site with donor...acceptor distances of 3.046 Å. 2.) oxygen positions of nitro group and pyrazole hydrogen site with donor...acceptor distances of 2.392-2.723 Å. 3.) oxygen positions of nitro group and boron hydrogen site with donor...acceptor distances of 2.829 Å. 4.) oxygen positions of nitro group and dichloromethane hydrogen site with donor...acceptor distances of 2.639-2.733 Å. a). Projection along  $[010]$ . b). Projection along  $[001]$ .

## Packing of $[(3\text{-NH}_2\text{Tp})_2\text{Fe}]$ in the crystal lattice.

a.)

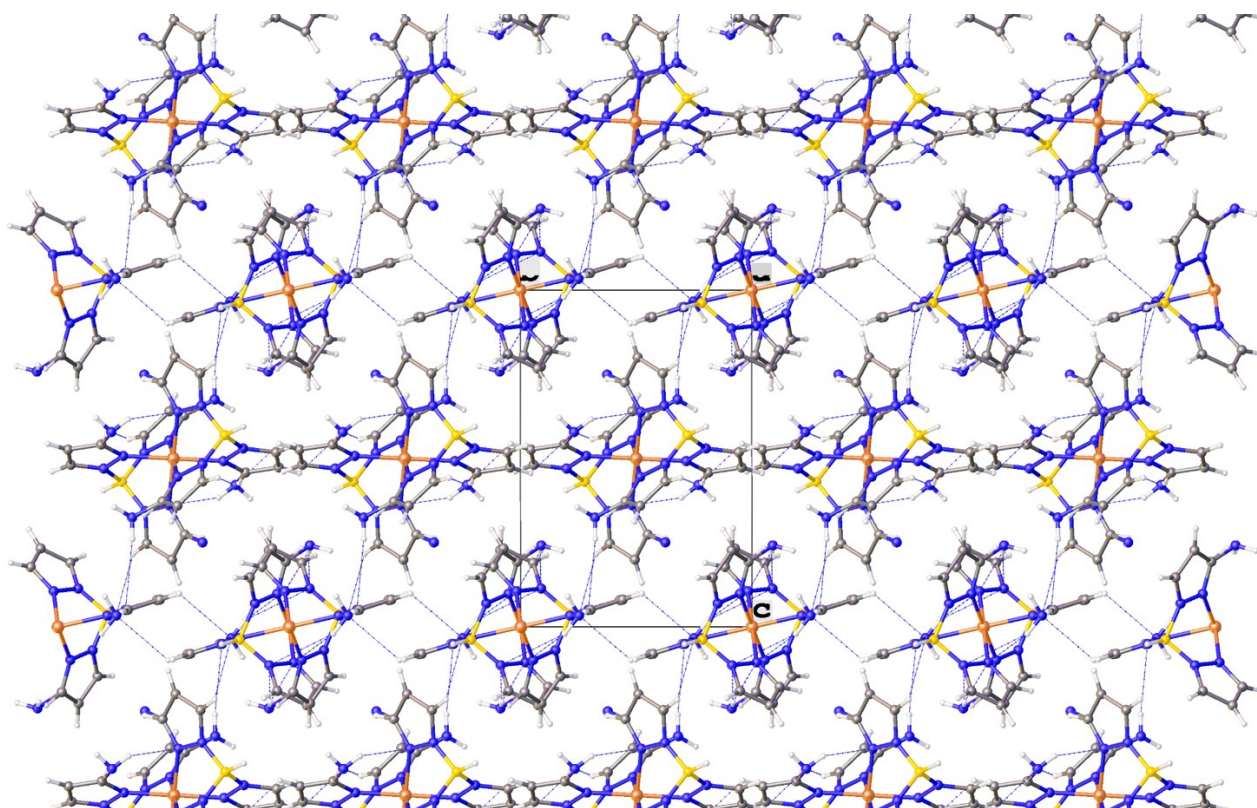

b.)

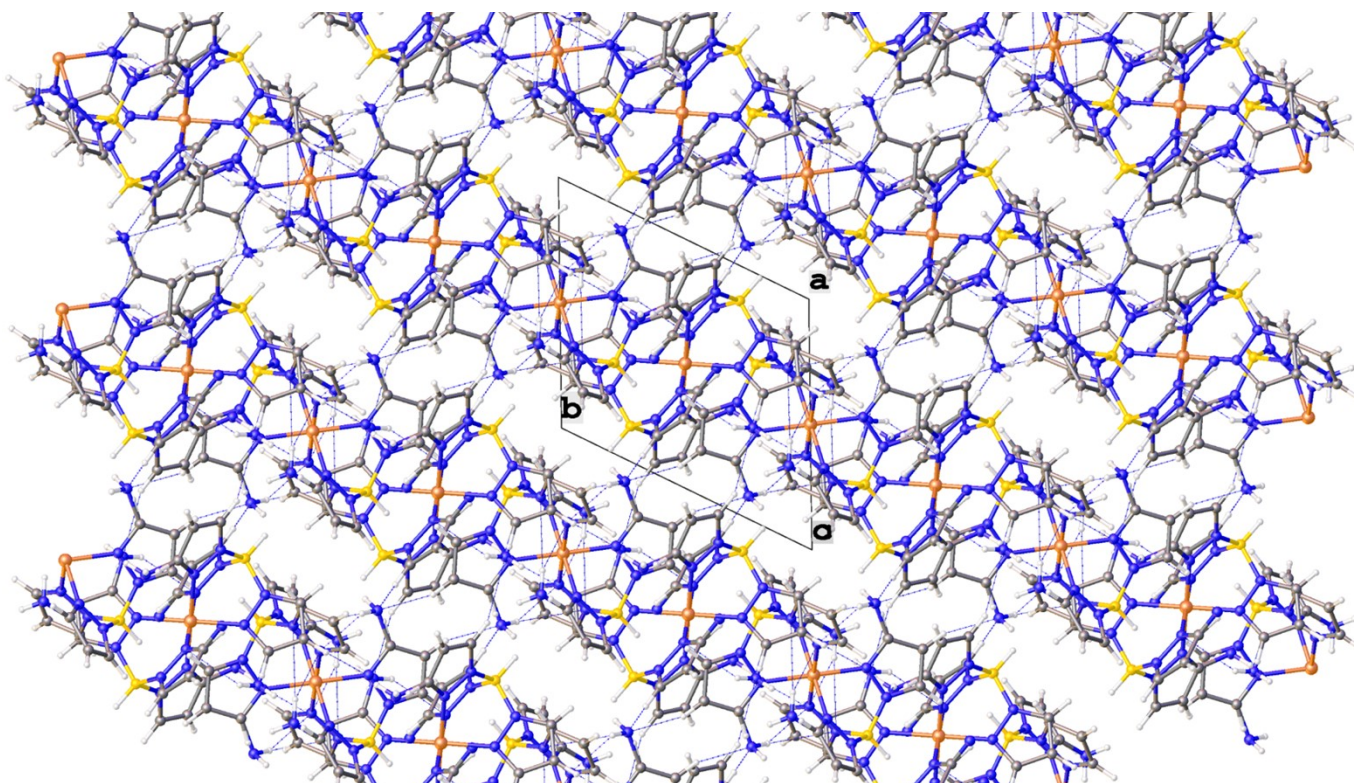

Figure 19. Non-classical hydrogen bonds are observed between 1). nitrogen positions of disordered amino group and pyrazole hydrogen site with donor...acceptor distances of 2.562-2.822 Å. 2). nitrogen position of pyrazole and amino hydrogen site with donor...acceptor distances of 2.250-2.879 Å. a). Projection along [100]. b). Projection along [001].

## Packing of $[(3\text{-NH}_2)_2\text{Tp}]_2\text{Fe}$ in the crystal lattice.

a.)

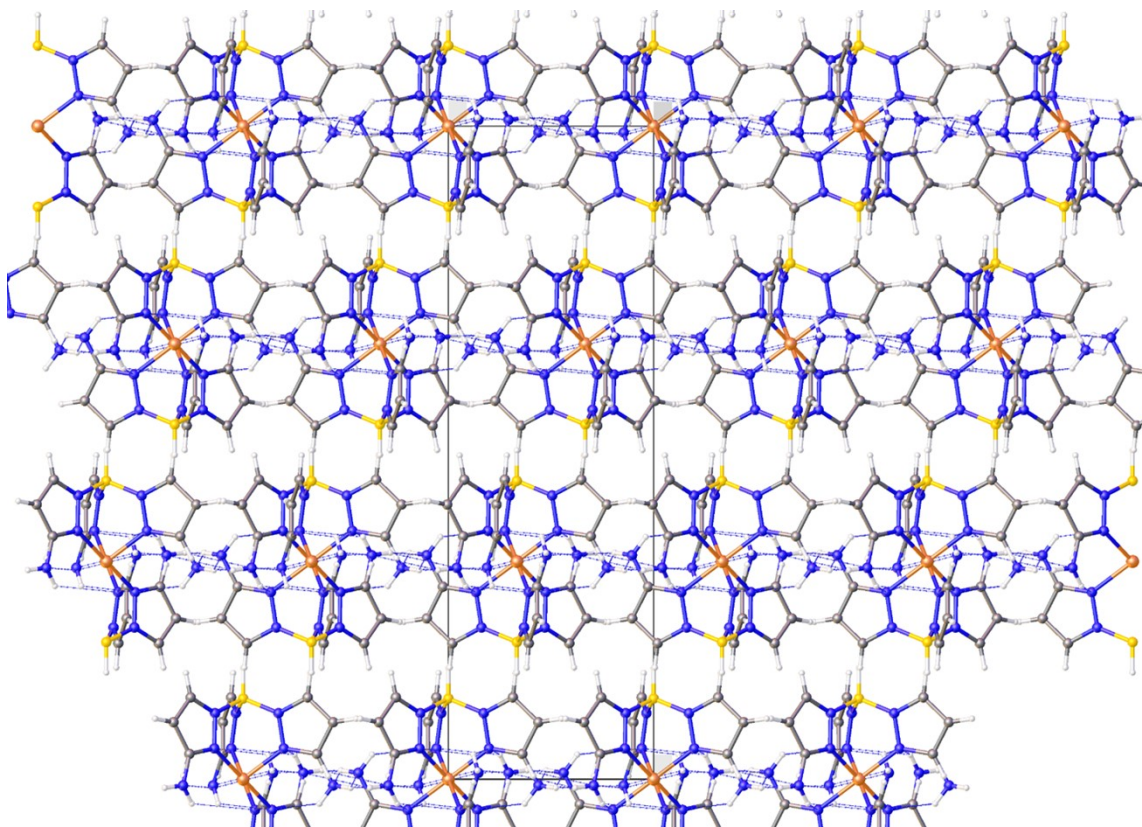

b.)

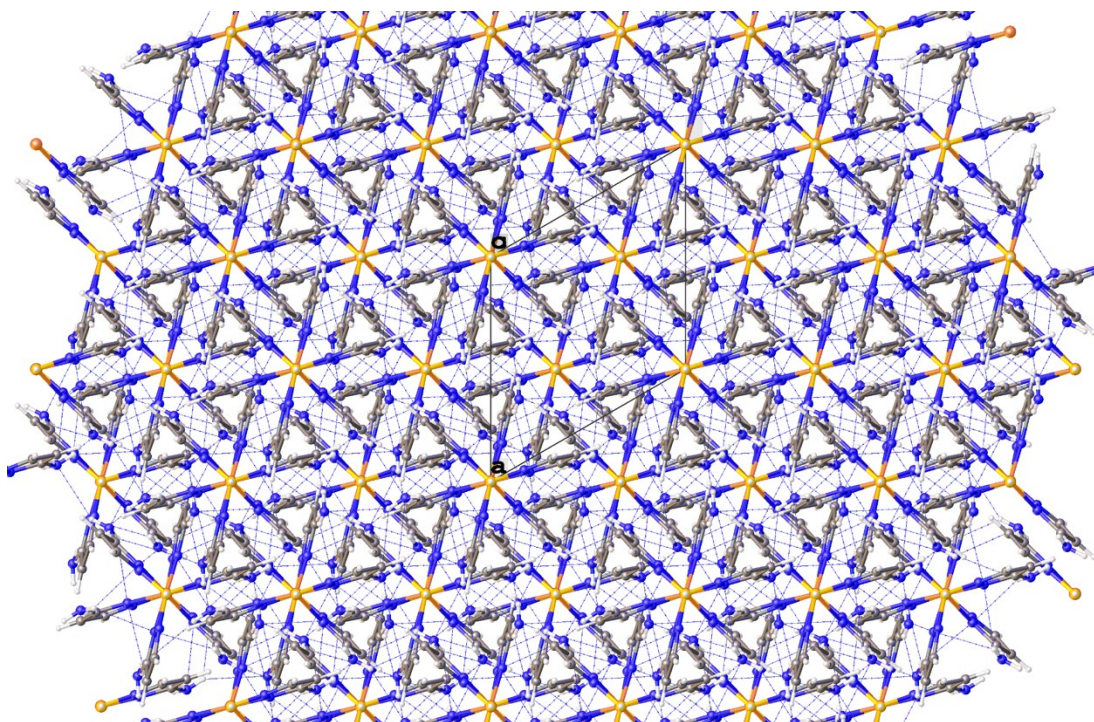

Figure 20. Non-classical hydrogen bonds are observed between 1). nitrogen positions of disordered amino group and disordered amino hydrogen site with donor...acceptor distances of 2.607-2.859 Å. 2). nitrogen

position of pyrazole and amino hydrogen site with donor...acceptor distances of 2.540-2.661 Å. a). Projection along [100]. b). Projection along [001].

**PXRD spectra:**

**[(3-NO<sub>2</sub>Tp)<sub>2</sub>Fe]**

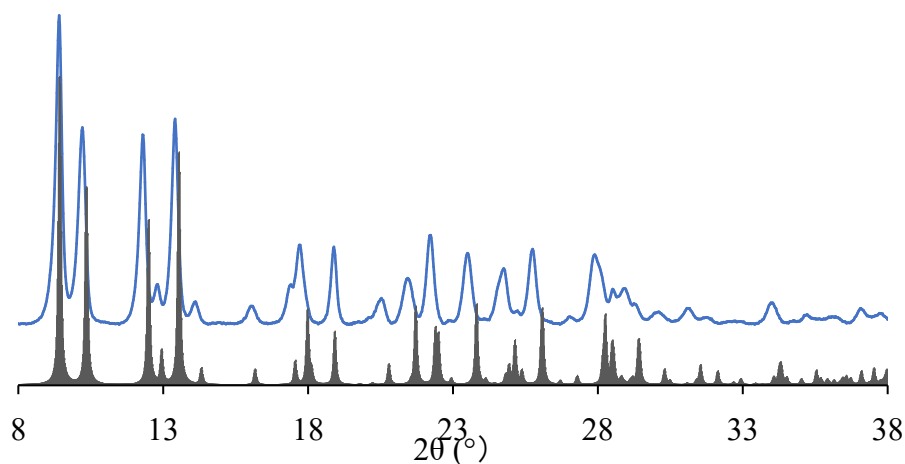

Figure 21. Powder X-ray diffraction patterns for [(3-NO<sub>2</sub>Tp)<sub>2</sub>Fe] crystals. The room temperature experimental PXRD pattern is represented as blue curve. The diffraction pattern calculated from the single crystal structure at 100 K is represented in black.

**[(Tp)Fe(3-NO<sub>2</sub>Tp)] · (C<sub>6</sub>H<sub>6</sub>)<sub>0.5</sub>**

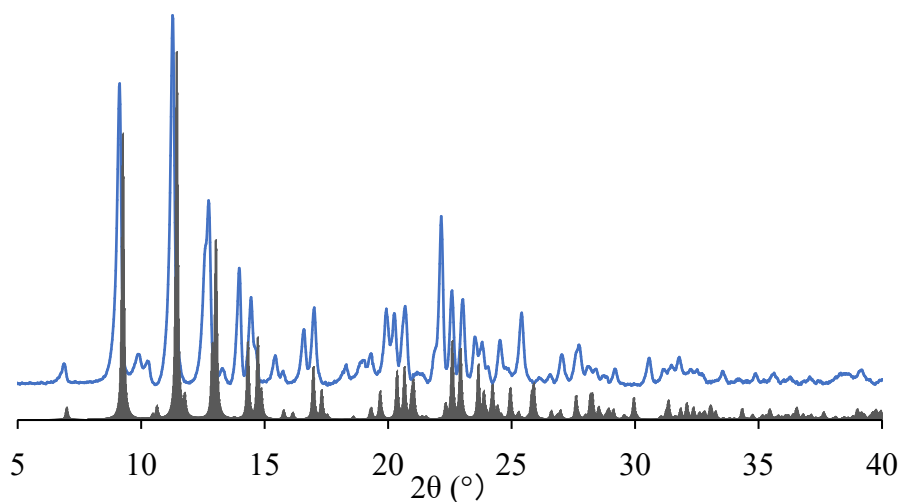

Figure 22. Powder X-ray diffraction patterns for [(Tp)Fe(3-NO<sub>2</sub>Tp)] · (C<sub>6</sub>H<sub>6</sub>)<sub>0.5</sub> crystals. The room temperature experimental PXRD pattern is represented as blue curve. The diffraction pattern calculated from the single crystal structure at 100 K is represented in black.

### [(Tp)Fe(4-NO<sub>2</sub>Tp)]

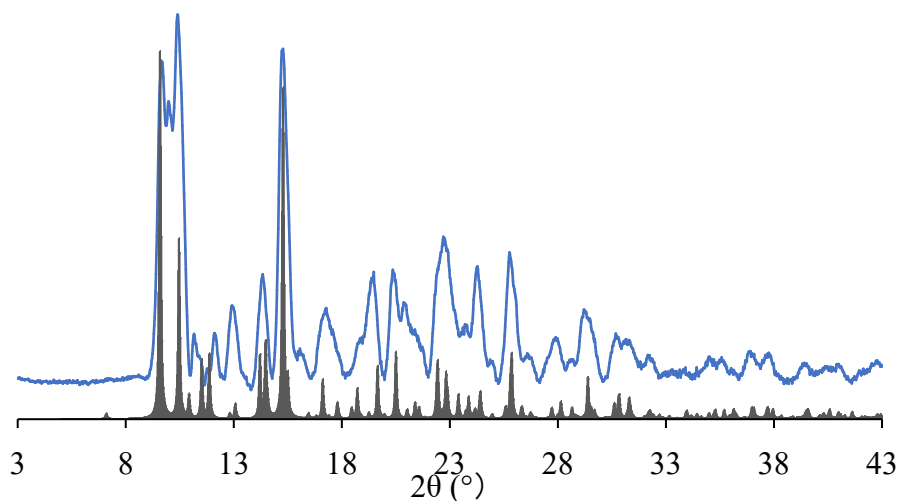

Figure 23. Powder X-ray diffraction patterns for [(Tp)Fe(4-NO<sub>2</sub>Tp)] crystals. The room temperature experimental PXR pattern is represented as blue curve. The diffraction pattern calculated from the single crystal structure at 100 K is represented in black.

### [(Tp)Fe(5-NO<sub>2</sub>Tp)]

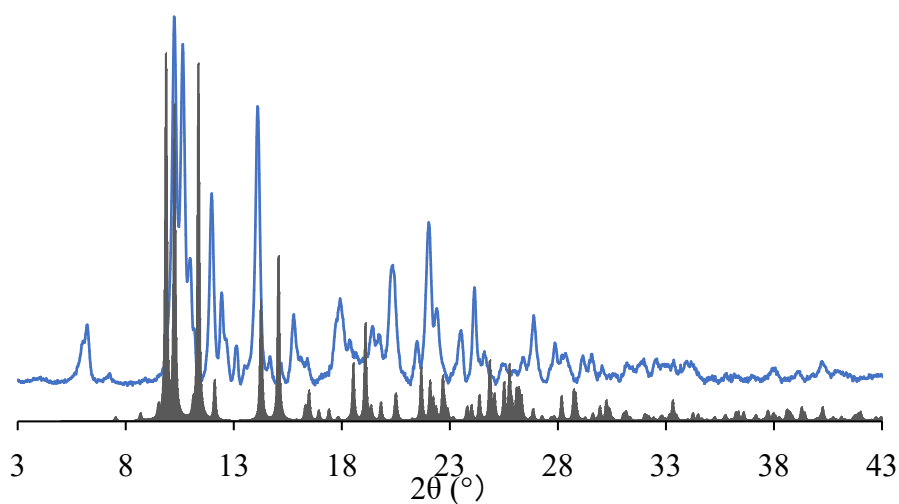

Figure 24. Powder X-ray diffraction patterns for desolvated [(Tp)Fe(5-NO<sub>2</sub>Tp)] crystals. It differs from the diffraction pattern calculated from the single crystal structure at 100 K of [(Tp)Fe(5-NO<sub>2</sub>Tp)]·(CH<sub>3</sub>CN)<sub>0.5</sub> (in black).

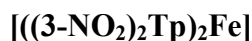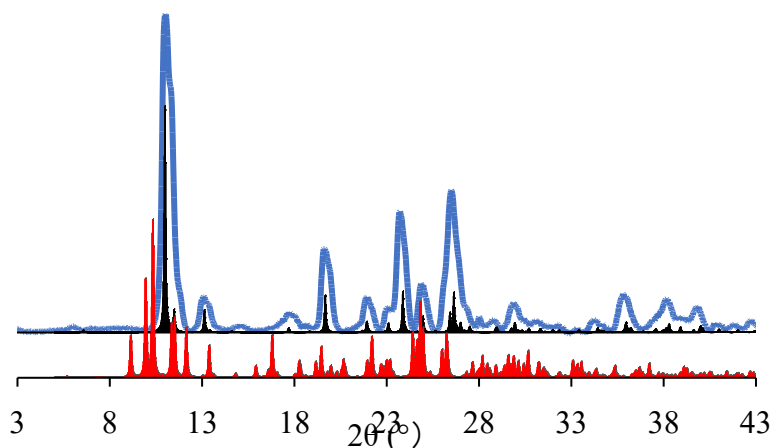

Figure 25. Powder X-ray diffraction pattern for de-solvated [(3-NO<sub>2</sub>)<sub>2</sub>Tp]<sub>2</sub>Fe·CH<sub>2</sub>Cl<sub>2</sub> crystals (blue). It differs from the diffraction pattern calculated from the single crystal structure at 100 K of [(3-NO<sub>2</sub>)<sub>2</sub>Tp]<sub>2</sub>Fe·CH<sub>2</sub>Cl<sub>2</sub> (in red), but fits the diffraction pattern for [(3-NO<sub>2</sub>)<sub>2</sub>Tp]<sub>2</sub>Fe calculated from the crystal structure at 298 K is in black.

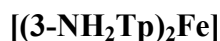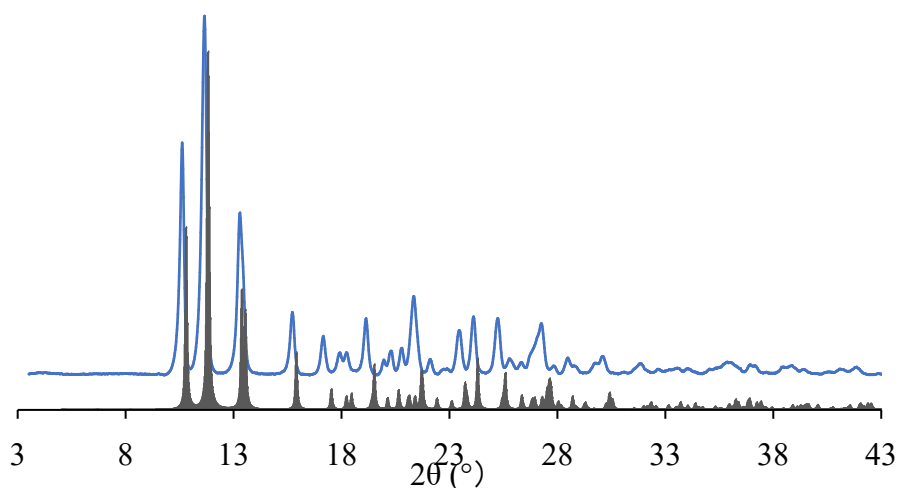

Figure 26. Powder X-ray diffraction patterns for [(3-NH<sub>2</sub>)<sub>2</sub>Tp]<sub>2</sub>Fe crystals. The room temperature experimental PXRD pattern is represented as blue curve. The diffraction pattern calculated from the single crystal structure at 100 K is represented in black.

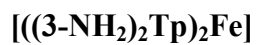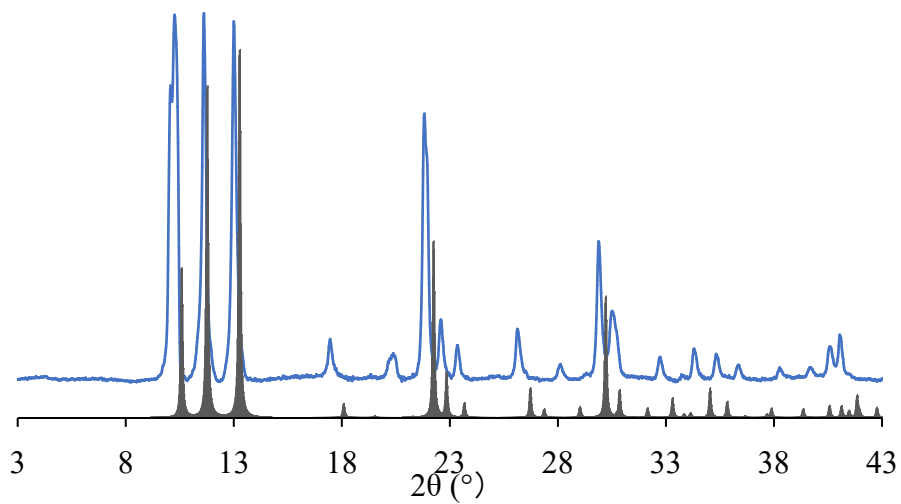

Figure 27. X-ray diffraction patterns for  $[(3\text{-NH}_2)_2\text{Tp}]_2\text{Fe}$  crystals. The room temperature experimental PXRD pattern is represented as blue curve. The diffraction pattern calculated from the single crystal structure at 100 K is represented in black.



**IR spectra:**

**TBA[4-NO<sub>2</sub>Tp]**

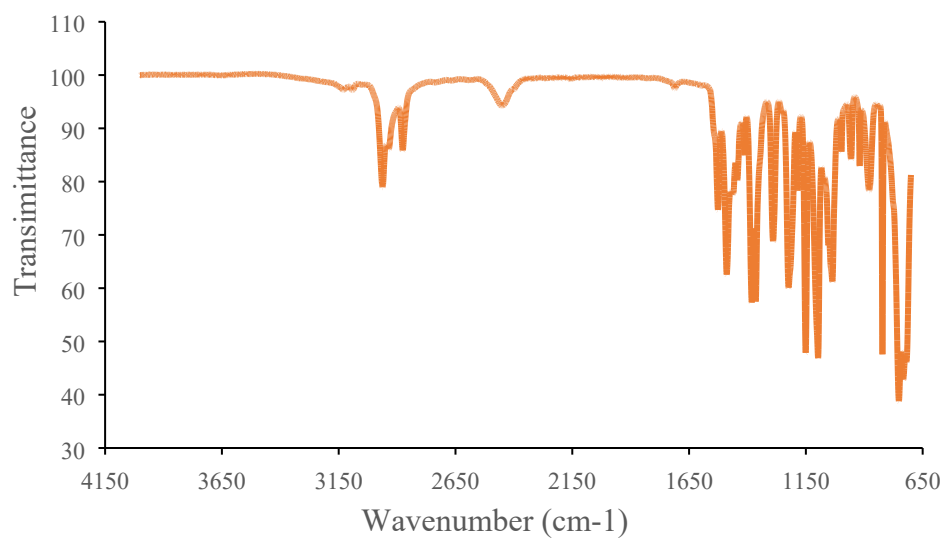

**TBA[3-NO<sub>2</sub>Tp]**

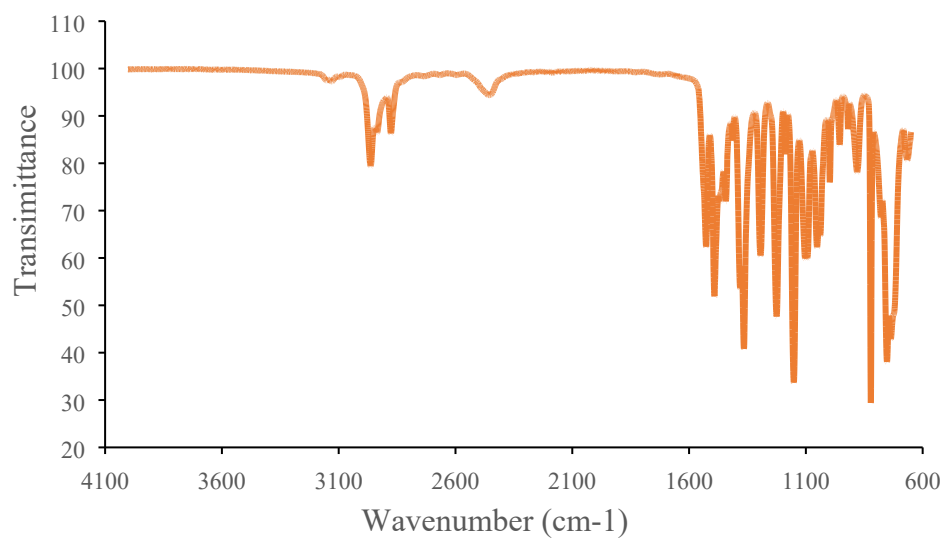

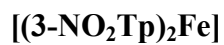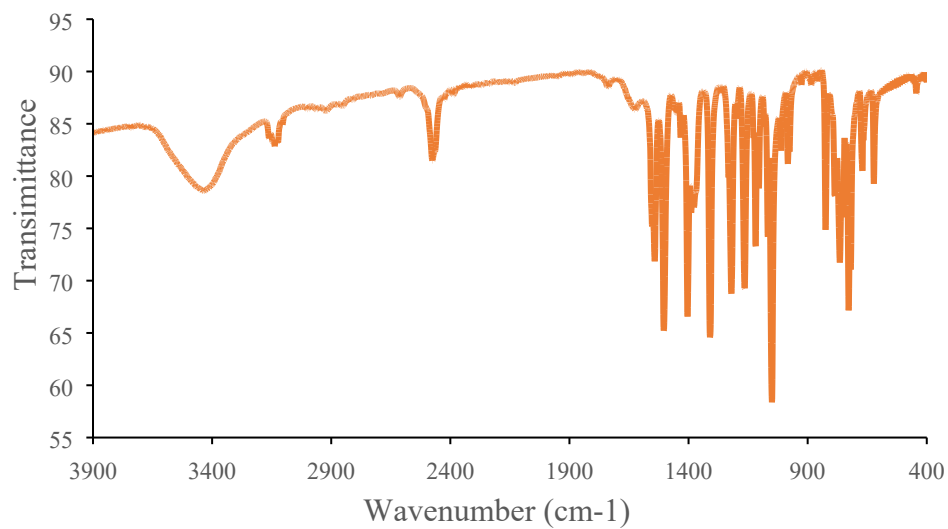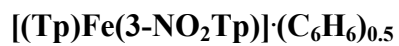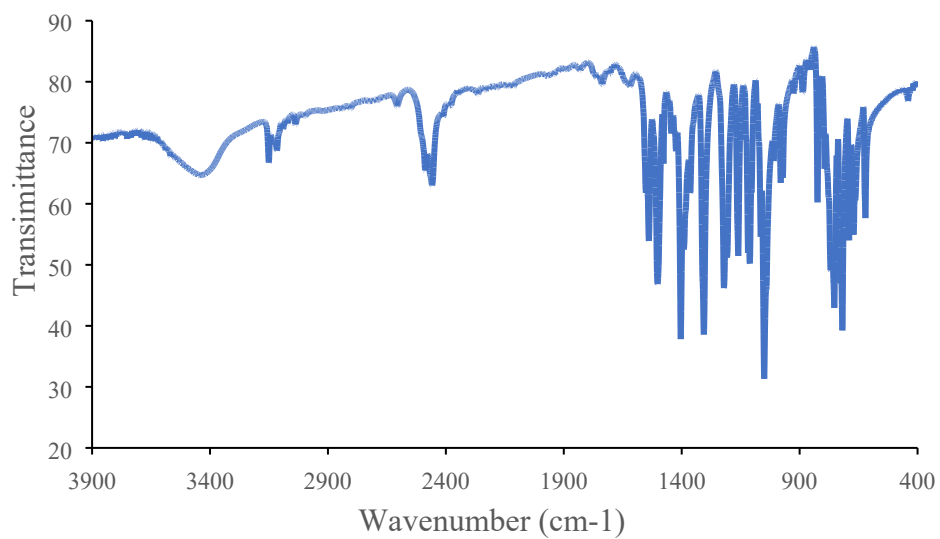

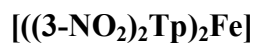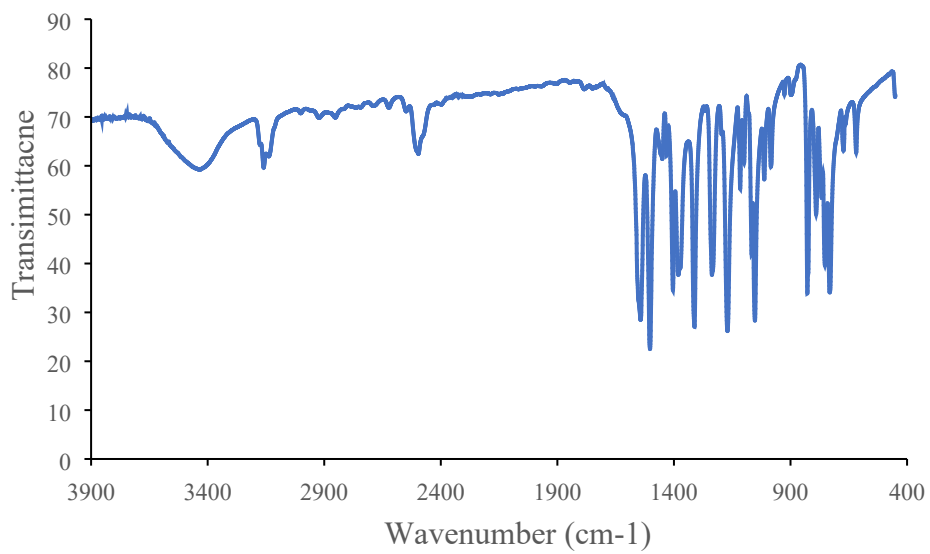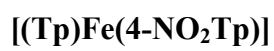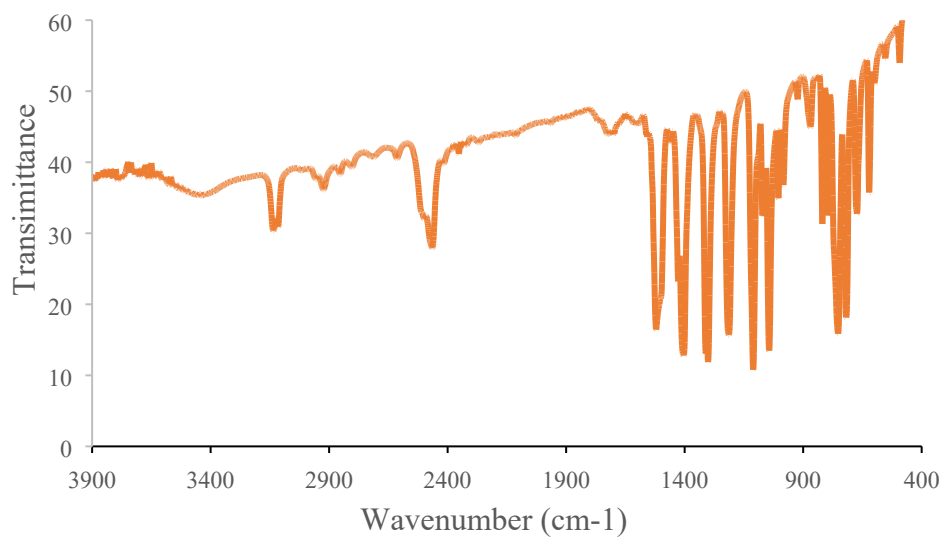

**[(Tp)Fe(5-NO<sub>2</sub>Tp)]**

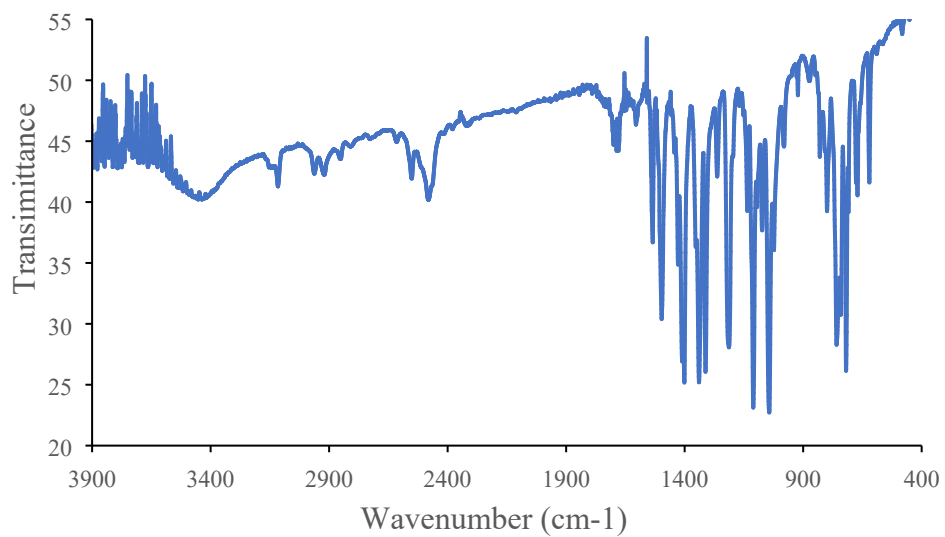

**[(3-NH<sub>2</sub>Tp)<sub>2</sub>Fe]**

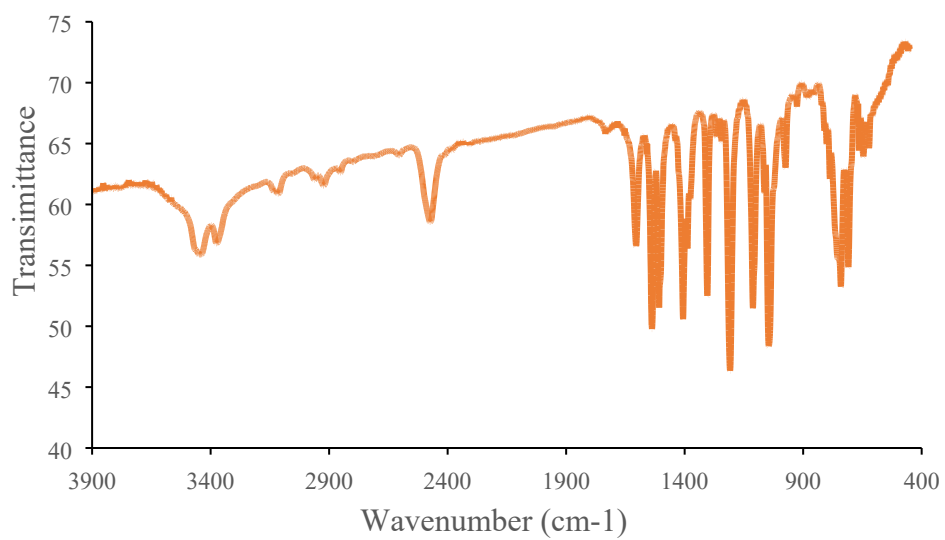

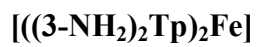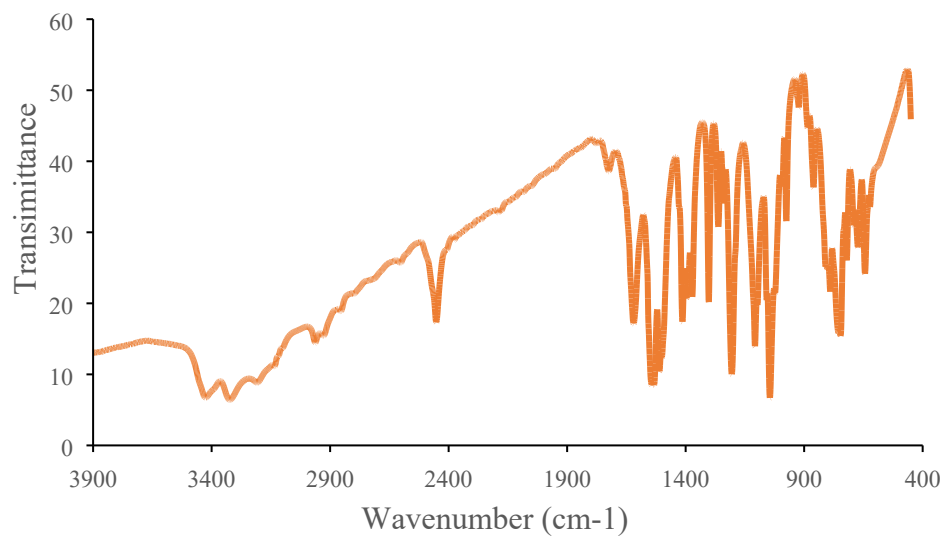

**UV-vis**  
**TBA[3-NO<sub>2</sub>Tp] in acetone**

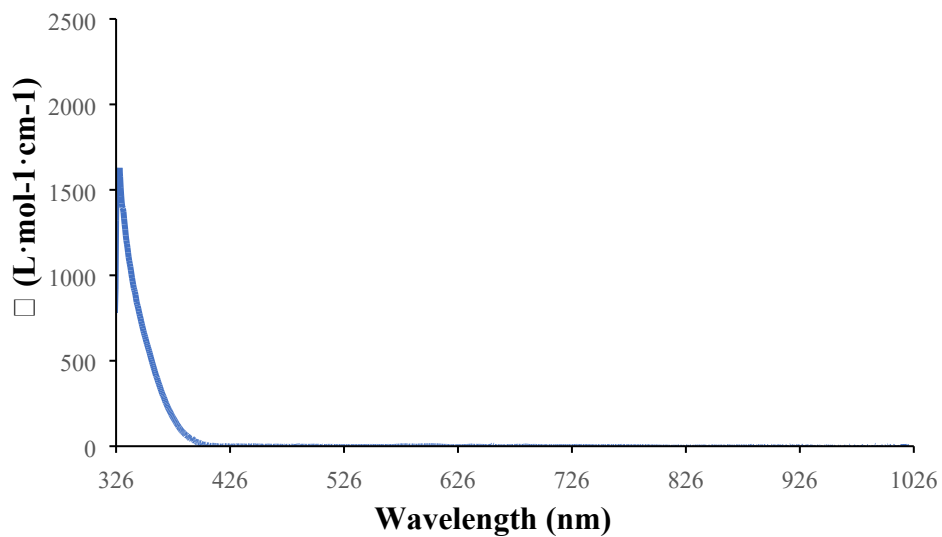

Figure 28. UV-VIS spectrum of TBA[3-NO<sub>2</sub>Tp] in acetone.

**TBA[(3-NO<sub>2</sub>)<sub>2</sub>Tp] in acetone**

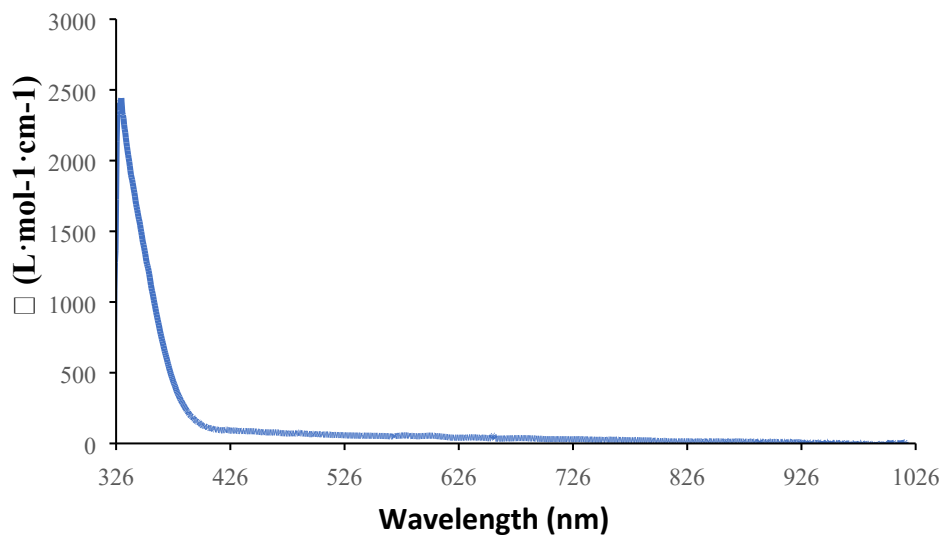

Figure 29. UV-VIS spectrum in TBA[(3-NO<sub>2</sub>)<sub>2</sub>Tp] in acetone.

### **[(3-NO<sub>2</sub>Tp)<sub>2</sub>Fe] in toluene**

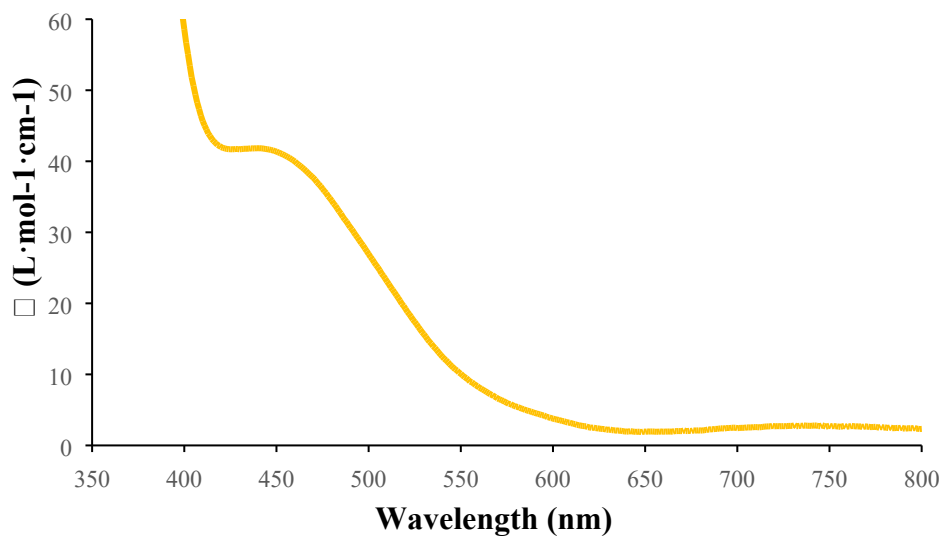

Figure 30. UV-VIS spectrum of [(3-NO<sub>2</sub>Tp)<sub>2</sub>Fe] in toluene.

### **[(Tp)Fe(3-NO<sub>2</sub>Tp)] in toluene**

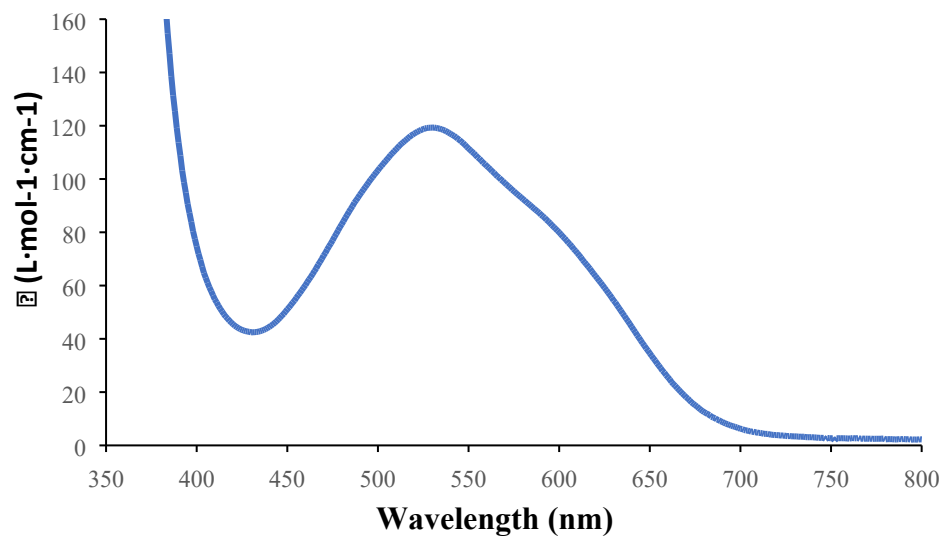

Figure 31. UV-VIS spectrum of [(Tp)Fe(3-NO<sub>2</sub>Tp)] in toluene. The absorption band maximum is located at 536 nm.

**$[(3\text{-NO}_2)_2\text{Tp}]_2\text{Fe}$  in DCM**

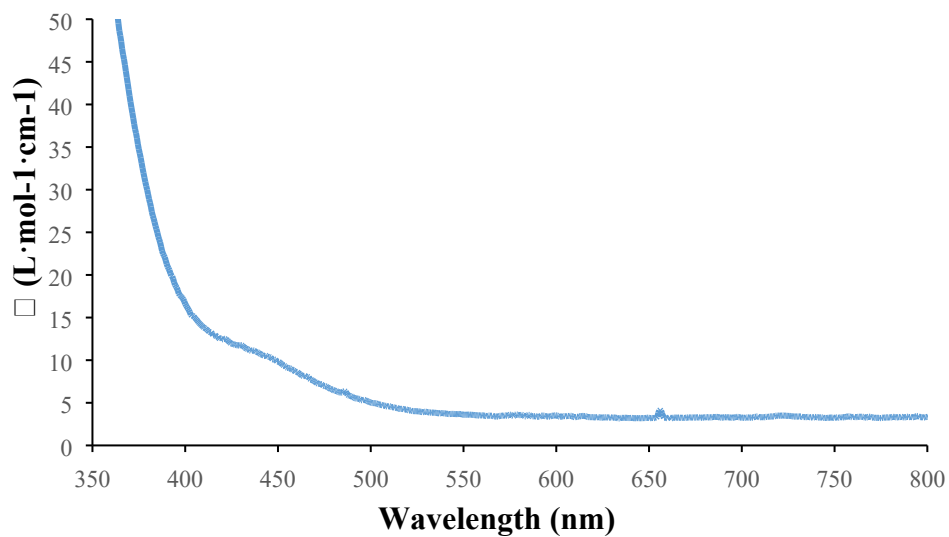

Figure 32. UV-VIS spectrum of  $[(3\text{-NO}_2)_2\text{Tp}]_2\text{Fe}$  in DCM.

**$[(\text{Tp})\text{Fe}(4\text{-NO}_2\text{Tp})]$  in toluene**

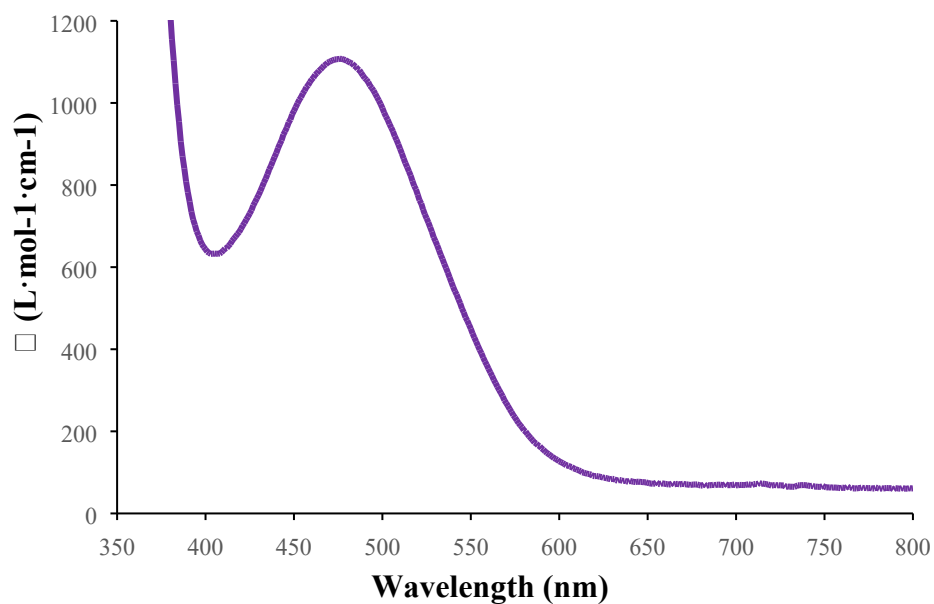

Figure 33. UV-VIS spectrum of  $[(\text{Tp})\text{Fe}(4\text{-NO}_2\text{Tp})]$  in toluene. The absorption band maximum is located at 484 nm.



**[(Tp)Fe(5-NO<sub>2</sub>Tp)] in toluene**

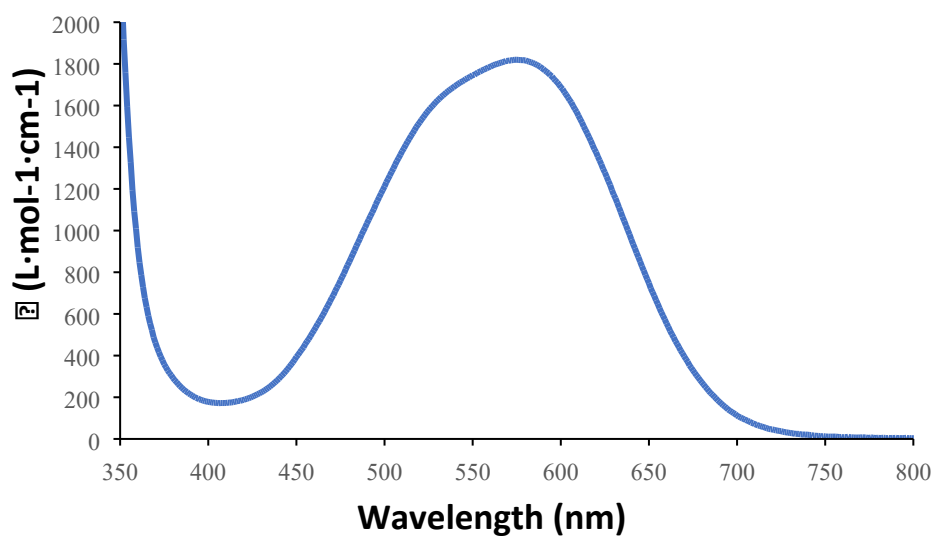

Figure 34. UV-VIS spectrum of [(Tp)Fe(5-NO<sub>2</sub>Tp)] in Toluene. The absorption band maximum is located at 585 nm.

**[(3-NH<sub>2</sub>Tp)<sub>2</sub>Fe] in DCM**

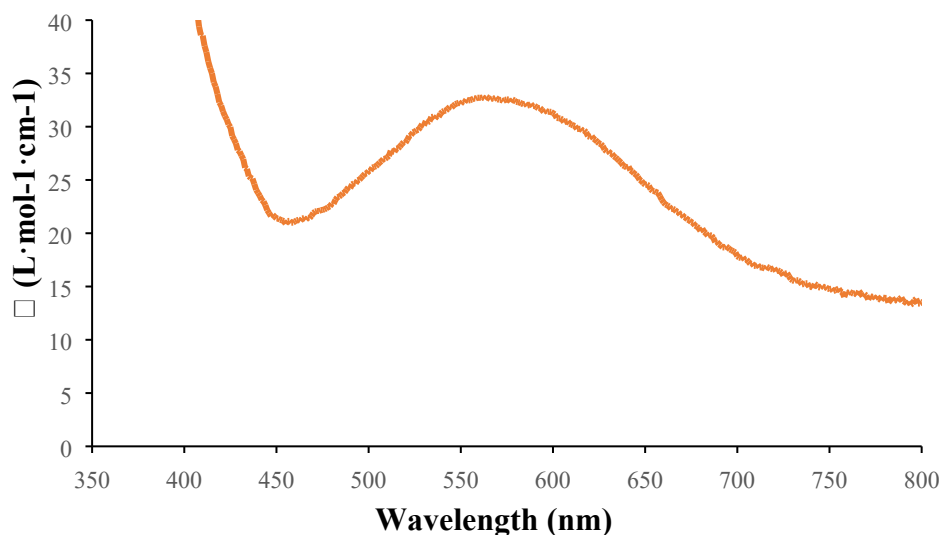

Figure 35. UV-VIS spectrum of [(3-NH<sub>2</sub>Tp)<sub>2</sub>Fe] in toluene. The absorption band maximum is located at 565 nm.

**[(3-NH<sub>2</sub>)<sub>2</sub>Tp)<sub>2</sub>Fe] in DCM**

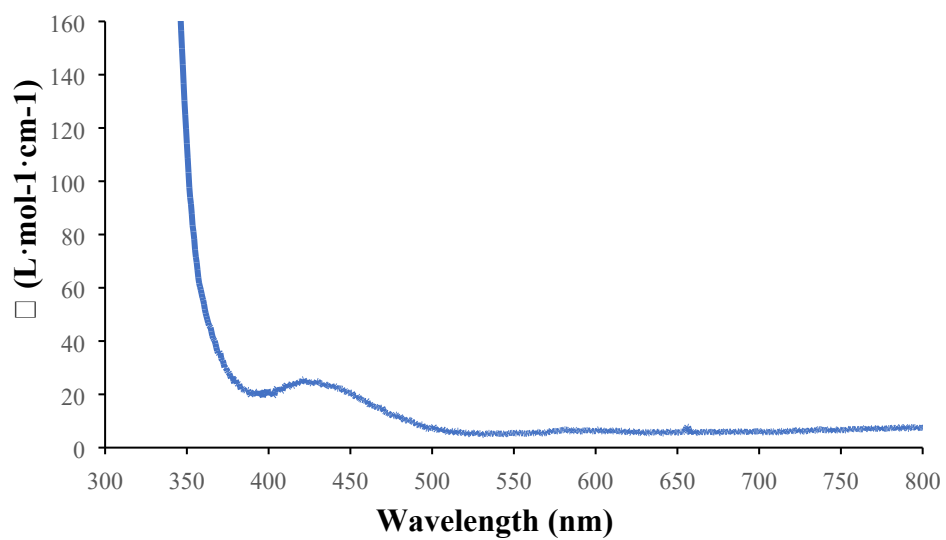

Figure 36. UV-VIS spectrum of [(3-NH<sub>2</sub>)<sub>2</sub>Tp)<sub>2</sub>Fe] in DCM.

**[(3-NO<sub>2</sub>Tp)<sub>2</sub>Fe] in air**

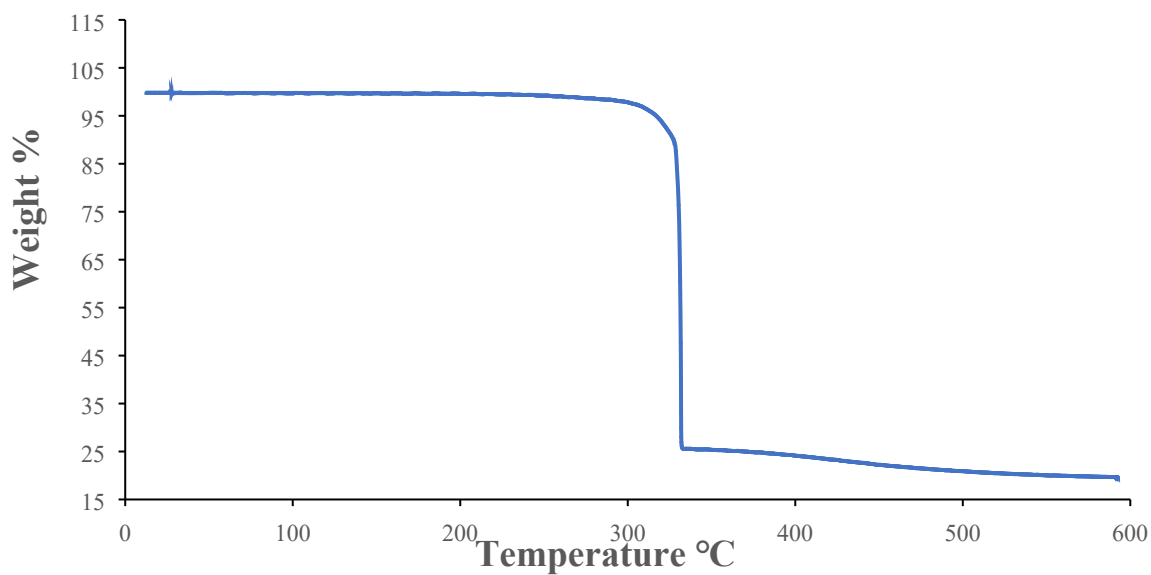

Figure 37. TGA of [(3-NO<sub>2</sub>Tp)<sub>2</sub>Fe] in air

**[(Tp)Fe(3-NO<sub>2</sub>Tp)] · 0.5 C<sub>6</sub>H<sub>6</sub> in air**

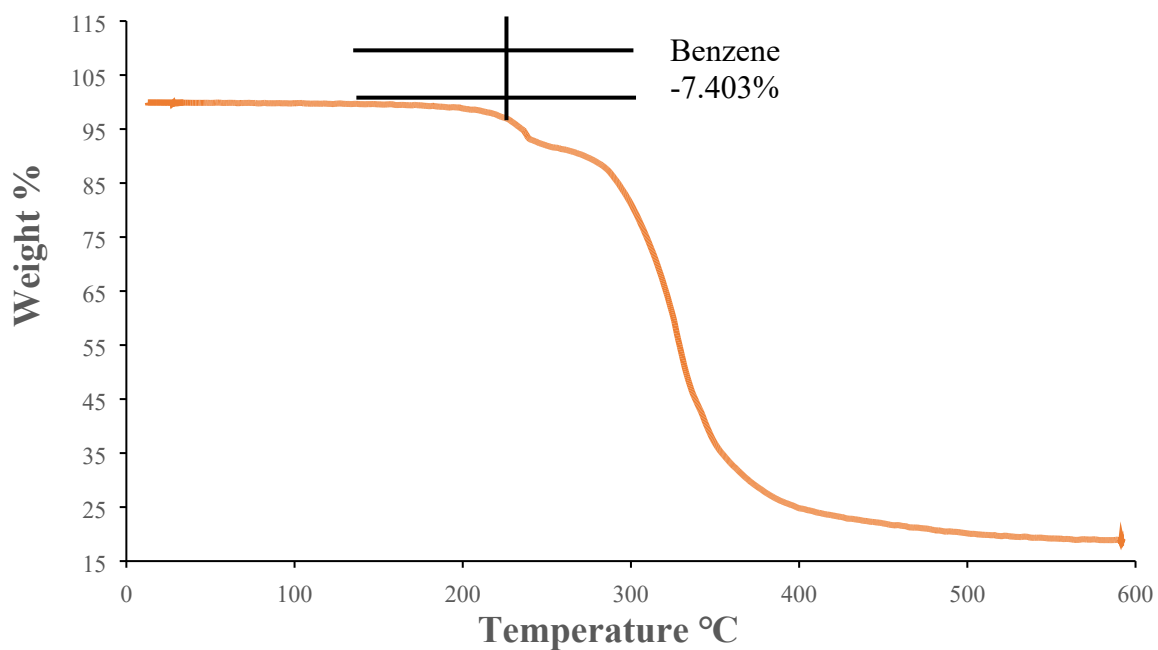

Figure 38. TGA of [(Tp)Fe(3-NO<sub>2</sub>Tp)] · 0.5 C<sub>6</sub>H<sub>6</sub> in air

**$[(3\text{-NO}_2)_2\text{Tp}]_2\text{Fe}$  in air**

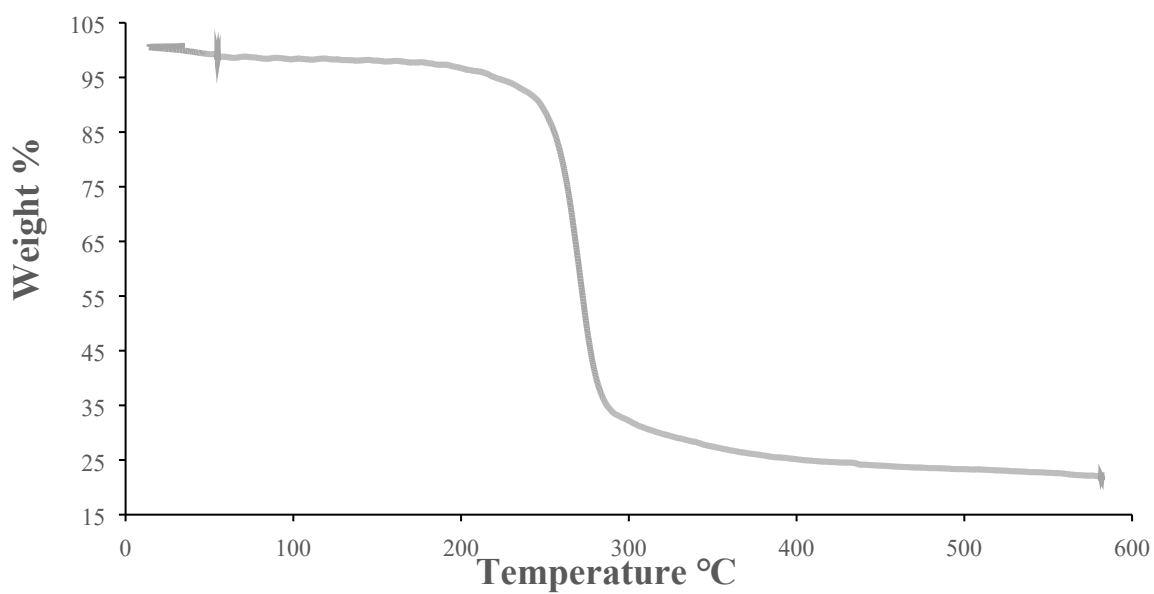

Figure 39. TGA of  $[(3\text{-NO}_2)_2\text{Tp}]_2\text{Fe}$  in air

**$[(\text{Tp})\text{Fe}(4\text{-NO}_2\text{Tp})]$  in air**

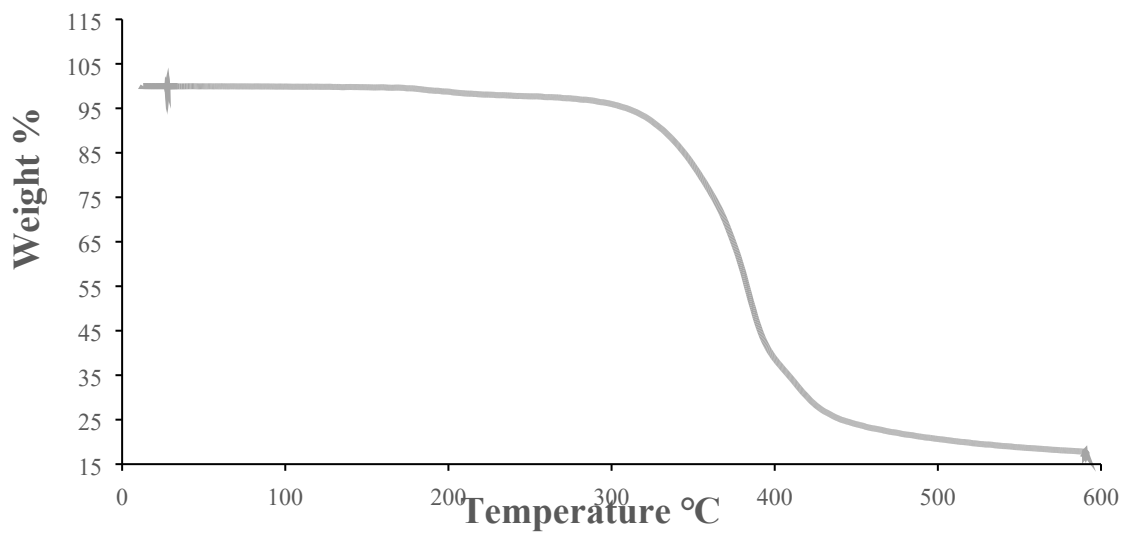

Figure 40. TGA of  $[(\text{Tp})\text{Fe}(4\text{-NO}_2\text{Tp})]$  in air

**$[(Tp)Fe(5-NO_2Tp)] \cdot 0.5 CH_3CN$  in air**

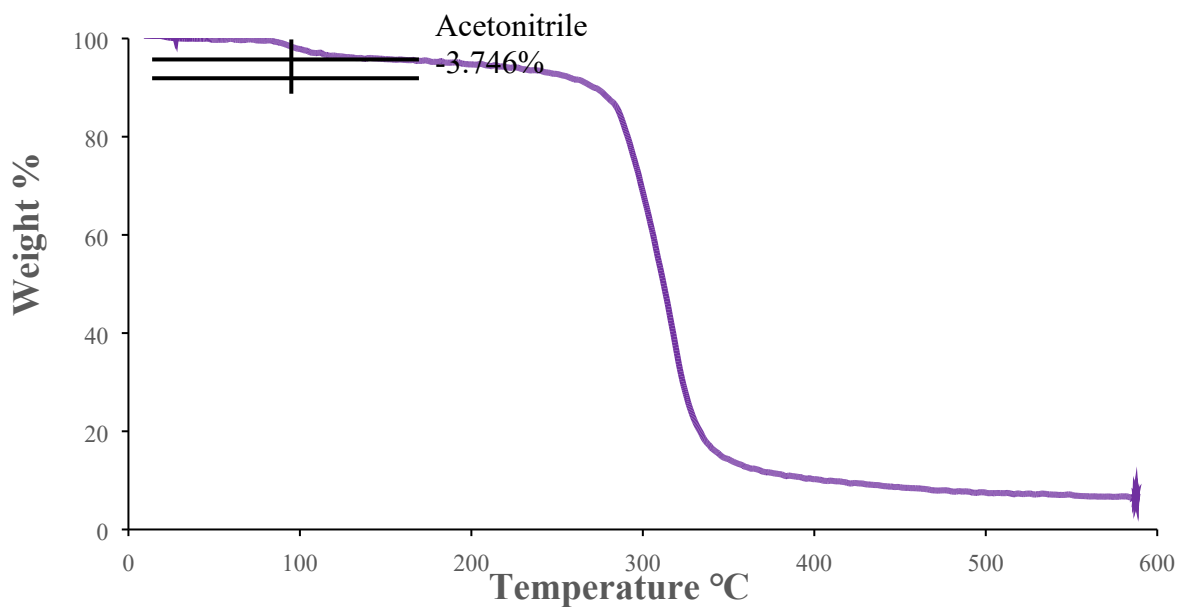

Figure 41. TGA of  $[(Tp)Fe(5-NO_2Tp)] \cdot 0.5 CH_3CN$  in air

**$[(3-NH_2Tp)_2Fe]$  in air**

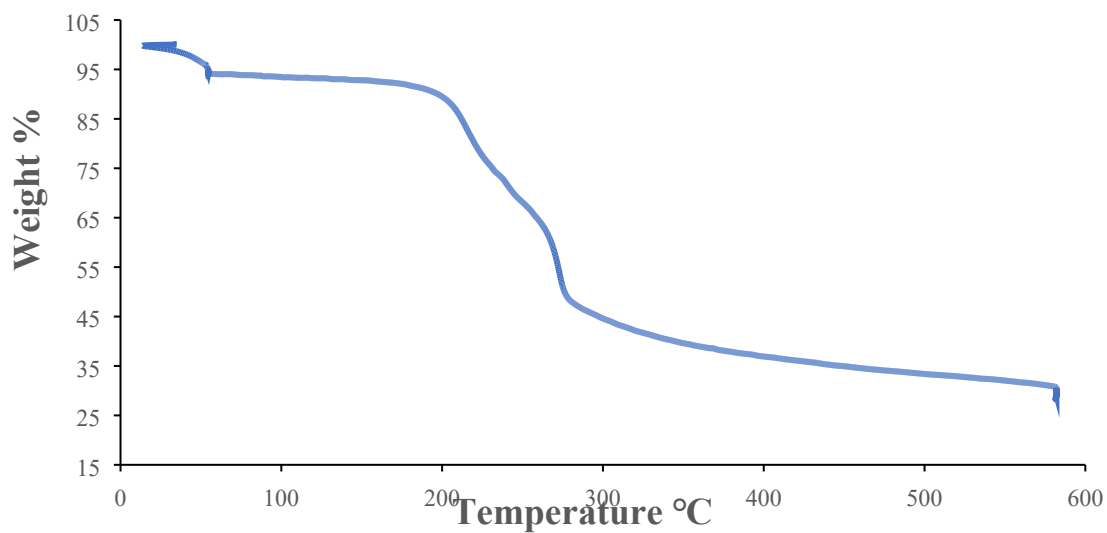

Figure 42. TGA of  $[(3-NH_2Tp)_2Fe]$  in air

**[[ $(3\text{-NH}_2)_2\text{Tp}$ ] $_2\text{Fe}$ ] in air**

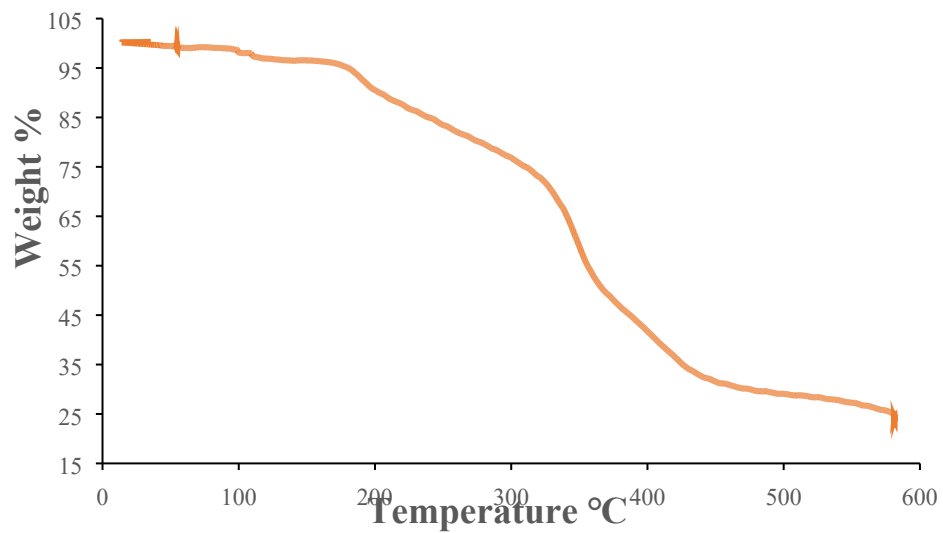

Figure 43. TGA of  $[[\text{(3-NH}_2)_2\text{Tp}]_2\text{Fe}]$  in air

**[(3-NO<sub>2</sub>Tp)<sub>2</sub>Fe]**

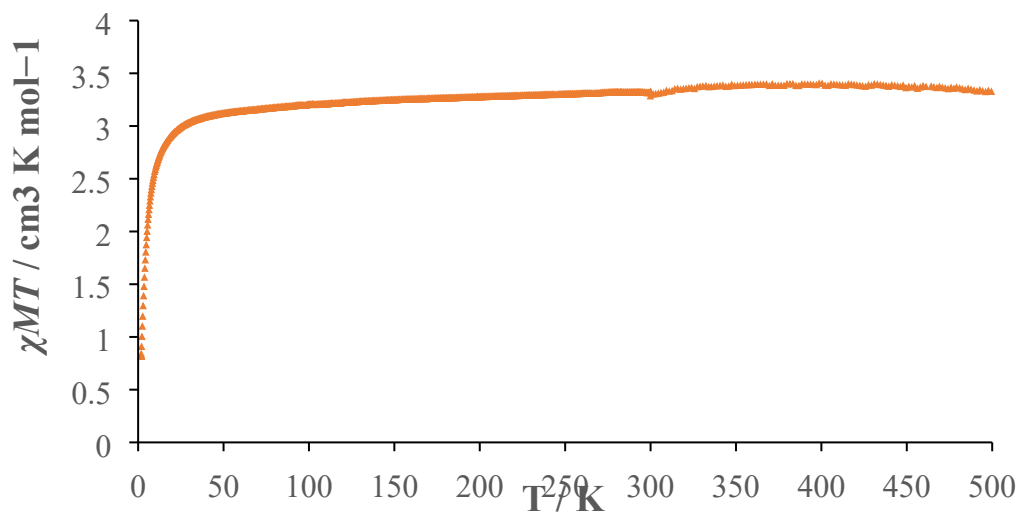

Figure 44. Temperature dependence of the molecular magnetic susceptibility of complexes [(3-NO<sub>2</sub>Tp)<sub>2</sub>Fe] at 0.1 T.

**[(Tp)Fe(3-NO<sub>2</sub>Tp)]**

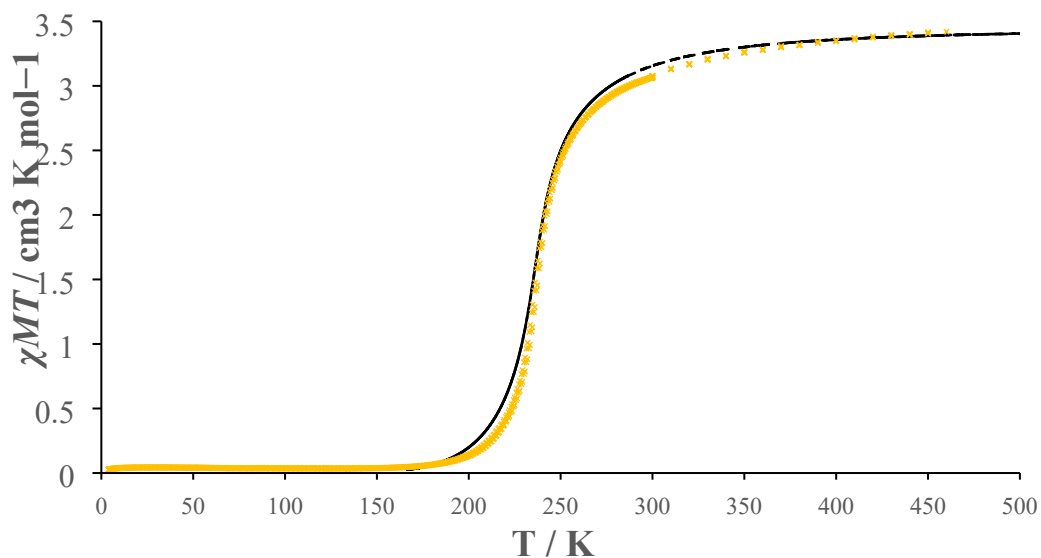

Figure 45. Temperature dependence of the molecular magnetic susceptibility of [(Tp)Fe(3-NO<sub>2</sub>Tp)]·(C<sub>6</sub>H<sub>6</sub>)<sub>0.5</sub> (x) at 0.1 T with best fits based on the Schlichter-Drickamer model (black dash line).

| <i>SCO fit parameters</i> | $T_{1/2} / \text{K}$ | $\Delta_r H / \text{kJ mol}^{-1}$ | $\Delta_r S / \text{J mol}^{-1} \text{K}^{-1}$ | $\Gamma / \text{kJ mol}^{-1}$ |
|---------------------------|----------------------|-----------------------------------|------------------------------------------------|-------------------------------|
|                           | 249                  | 13                                | 54.7                                           | 2.9                           |

**[(Tp)Fe(4-NO<sub>2</sub>Tp)]**

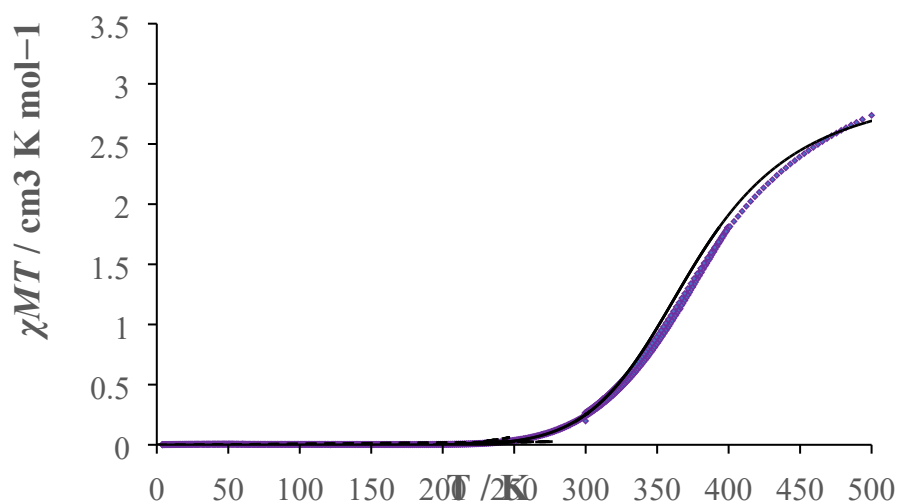

Figure 46. Temperature dependence of the molecular magnetic susceptibility of [(Tp)Fe(4-NO<sub>2</sub>Tp)] (◆) at 0.1 T with best fits based on the Schlichter-Drickamer model (black dash line).

| <i>SCO fit parameters</i> | $T_{1/2} / \text{K}$ | $\Delta_r H / \text{kJ mol}^{-1}$ | $\Delta_r S / \text{J mol}^{-1} \text{K}^{-1}$ | $\Gamma / \text{kJ mol}^{-1}$ |
|---------------------------|----------------------|-----------------------------------|------------------------------------------------|-------------------------------|
|                           | 384                  | 24.4                              | 65                                             | 1.2                           |

#### [(Tp)Fe(5-NO<sub>2</sub>Tp)]

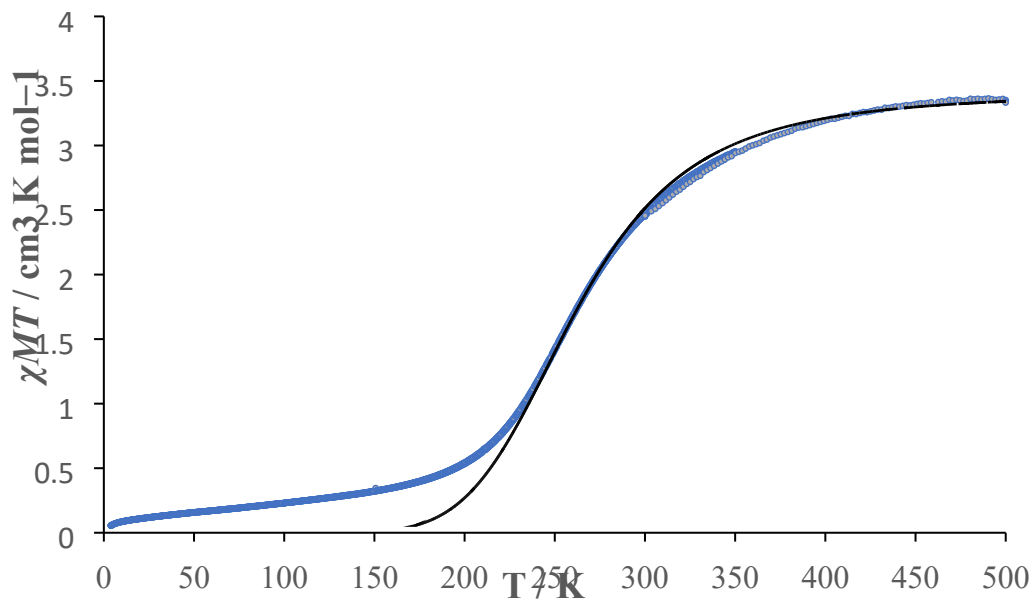

Figure 47. Temperature dependence of the molecular magnetic susceptibility of [(Tp)Fe(5-NO<sub>2</sub>Tp)] (●) at 0.1 T with best fits based on the Schlichter-Drickamer model (black dash line).

| <i>SCO fit parameters</i> | $T_{1/2} / \text{K}$ | $\Delta_r H / \text{kJ mol}^{-1}$ | $\Delta_r S / \text{J mol}^{-1} \text{K}^{-1}$ | $\Gamma / \text{kJ mol}^{-1}$ |
|---------------------------|----------------------|-----------------------------------|------------------------------------------------|-------------------------------|
|                           | 252                  | 17                                | 65                                             | 0.1                           |

#### [(3-NH<sub>2</sub>Tp)<sub>2</sub>Fe]



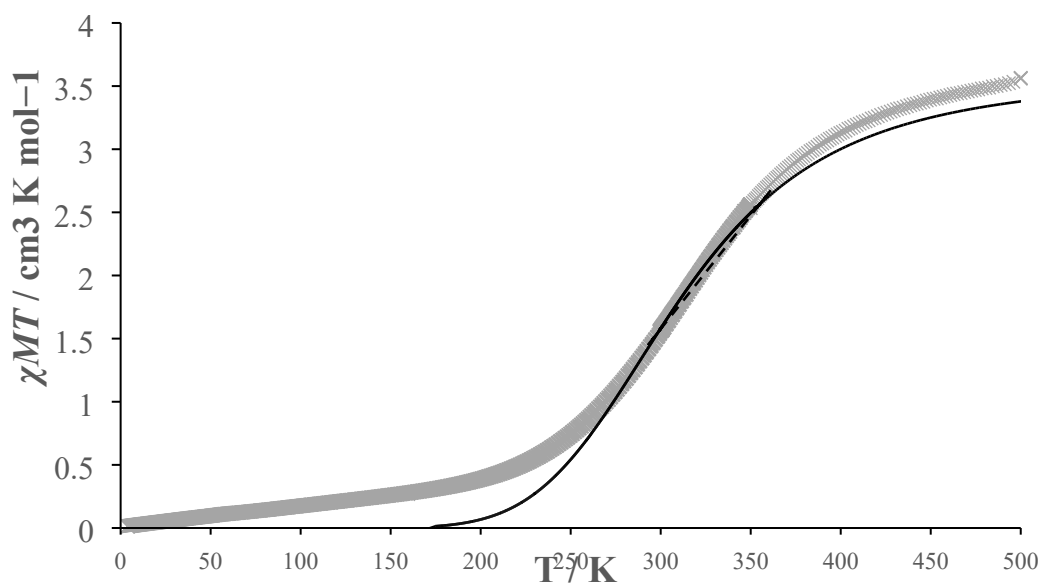

Figure 48. Temperature dependence of the molecular magnetic susceptibility of  $[(3\text{-NH}_2\text{Tp})_2\text{Fe}]$  ( $\times$ ) at 0.1 T with best fits based on the Schlichter-Drickamer model (black dash line).

| <i>SCO fit parameters</i> | $T_{1/2} / \text{K}$ | $\Delta_r H / \text{kJ mol}^{-1}$ | $\Delta_r S / \text{J mol}^{-1} \text{K}^{-1}$ | $\Gamma / \text{kJ mol}^{-1}$ |
|---------------------------|----------------------|-----------------------------------|------------------------------------------------|-------------------------------|
|                           | 316                  | 18.5                              | 59.7                                           | 1.0                           |

$[(3\text{-NO}_2)_2\text{Tp}]_2\text{Fe}$

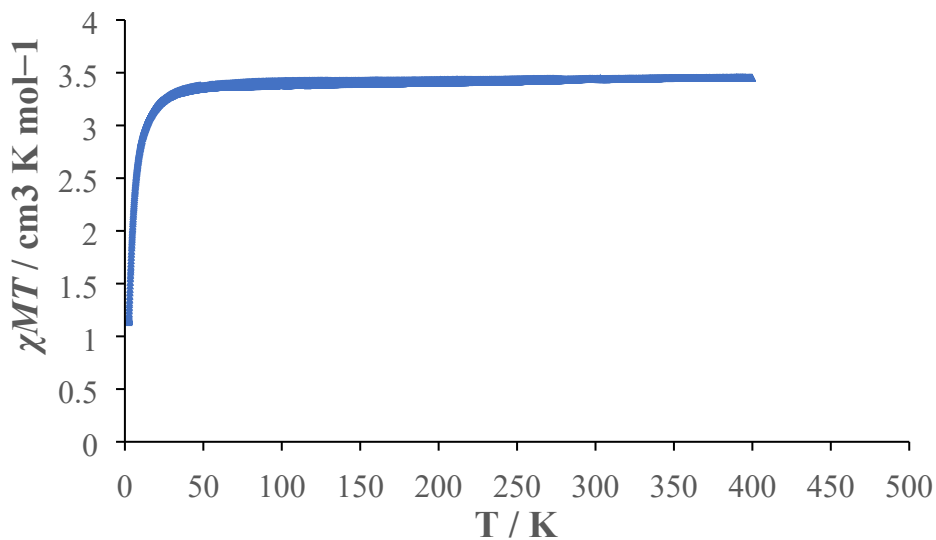

Figure 49. Temperature dependence of the molecular magnetic susceptibility of  $[(3\text{-NO}_2)_2\text{Tp}]_2\text{Fe}$  at 0.1 T.

$[(3\text{-NH}_2)_2\text{Tp}]_2\text{Fe}$

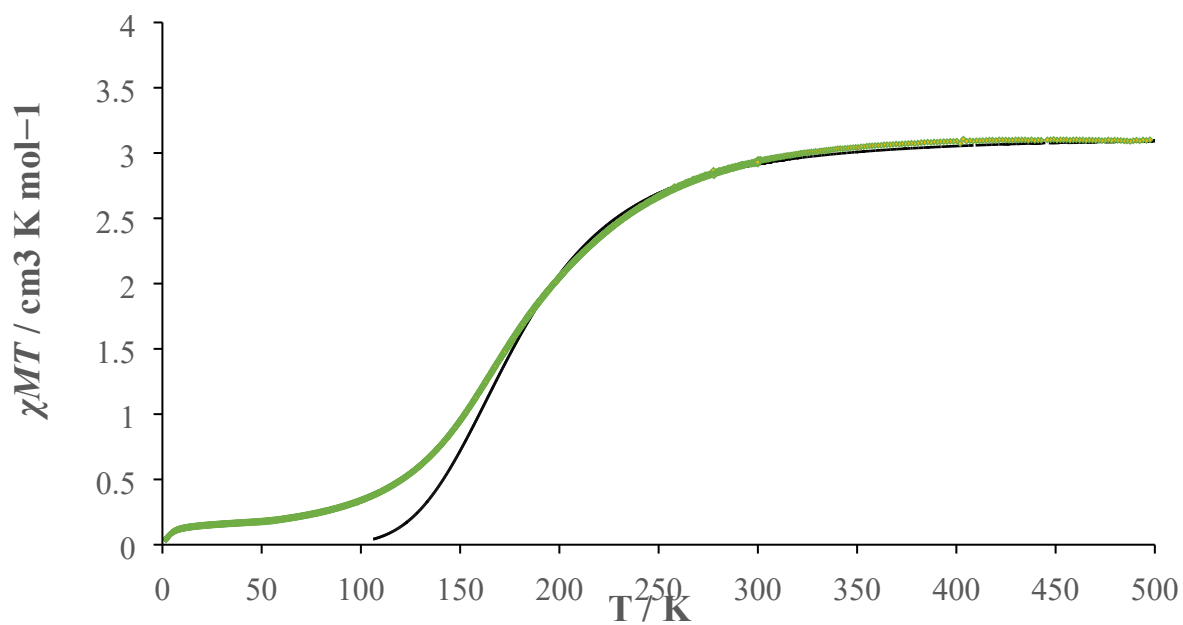

Figure 50. Temperature dependence of the molecular magnetic susceptibility of  $[(3\text{-NH}_2)_2\text{Tp}]_2\text{Fe}$  ( $\blacklozenge$ ) at 0.1 T with best fits based on the Schlichter-Drickamer model (black dash line).

| <i>SCO fit parameters</i> | $T_{1/2} / \text{K}$ | $\Delta_r H / \text{kJ mol}^{-1}$ | $\Delta_r S / \text{J mol}^{-1} \text{K}^{-1}$ | $\Gamma / \text{kJ mol}^{-1}$ |
|---------------------------|----------------------|-----------------------------------|------------------------------------------------|-------------------------------|
|                           | 178                  | 9.3                               | 52                                             | 0                             |

Slichter-Drickamer fitting parameters. Number between parentheses represent 95% confidence interval error bars.

|                                            | $[(\text{Tp})\text{Fe}(\text{3-NO}_2\text{Tp})] \cdot (\text{C}_6\text{H}_6)_{0.5}$ | $[(\text{Tp})\text{Fe}(\text{4-NO}_2\text{Tp})]$ | $[(\text{Tp})\text{Fe}(\text{5-NO}_2\text{Tp})]$ | $[(\text{3-NH}_2\text{Tp})_2\text{Fe}]$ | $[\text{((3-NH}_2)_2\text{Tp)}_2\text{Fe}]$ | $[(\text{4-NO}_2\text{Tp})_2\text{Fe}]$ | $[(\text{Tp})\text{Fe}(\text{4-NO}_2)_2\text{Tp}]$ | $[\text{((4-NO}_2)_2\text{Tp)}_2\text{Fe}]$ | $[(\text{4-NH}_2\text{Tp})_2\text{Fe}]$ |
|--------------------------------------------|-------------------------------------------------------------------------------------|--------------------------------------------------|--------------------------------------------------|-----------------------------------------|---------------------------------------------|-----------------------------------------|----------------------------------------------------|---------------------------------------------|-----------------------------------------|
| $\chi_M T_{max}$                           | 3.46                                                                                | 3                                                | 3.42                                             | 3.62                                    | 3.15                                        | 3.3                                     | 3.3                                                | 3                                           | 3                                       |
| $T_{1/2} / \text{K}$                       | 249                                                                                 | 384                                              | 252                                              | 316                                     | 178                                         | 394                                     | 401                                                | 456                                         | 388                                     |
| $\Delta_r H / \text{kJ mol}^{-1}$          | 13<br>(12.8, 13.2)                                                                  | 24.4<br>(23.7, 25.2)                             | 17.0<br>(16.7, 17.3)                             | 18.5<br>(17.9, 19.1)                    | 9.3<br>(9.2, 9.4)                           | 26.0<br>(25.4, 26.6)                    | 29.0<br>(25.0, 33.0)                               | 34.0<br>(11.6, 56.4)                        | 19.0<br>(10.1, 28.0)                    |
| $\Delta_r S / \text{J mol}^{-1}$           | 54.7<br>(53.9, 55.5)                                                                | 65.0<br>(63, 67)                                 | 65.0<br>(63.9, 66.1)                             | 59.7<br>(57.9, 61.6)                    | 52.0<br>(45.7, 46.4)                        | 65.9<br>(64.7, 67.0)                    | 72.3<br>(62.3, 81.8)                               | 74.5<br>(26.3, 122.6)                       | 50.0<br>(27.0, 73.0)                    |
| $\Gamma / \text{kJ mol}^{-1}$              | 2.9<br>(2.8, 3.1)                                                                   | 1.2<br>(0.96, 1.48)                              | 0<br>(0, 0.35)                                   | 0<br>(0, 0.26)                          | 0<br>(0, 0.08)                              | 6.6<br>(6.01, 7.57)                     | 4.0<br>(0.59, 7.40)                                | 0.6<br>(0, 6.50)                            | 1.3<br>(0, 4.40)                        |
| Number of nearest neighbors in the crystal | 9                                                                                   | 8                                                | 6, 12 <sup>a</sup>                               | 6, 12                                   | 6                                           | 8                                       | 8, 11                                              | 8                                           | 12, 14                                  |
| Reference                                  | This work                                                                           | This work                                        | This work                                        | This work                               | This work                                   | <i>b</i>                                | <i>b</i>                                           | <i>b</i>                                    | <i>c</i>                                |

*a*: Data given for  $[(\text{Tp})\text{Fe}(\text{5-NO}_2\text{Tp})] \cdot (\text{CH}_3\text{CN})_{0.5}$  *b*. Revised fit of the data from reference [1]. *v*. Reference [1].

1. Flototto, H.; Secker, T.; Kogerler, P.; Besson, C., Amine-Functionalized Spin Crossover Building Blocks. *Eur. J. Inorg. Chem.* **2019**, 2019 (43), 4621-4624.
